# Supplementary material for: Whole-Exome Sequencing-Based Mutational Profiling of Hepatitis B Virus-Related Early-Stage Hepatocellular Carcinoma
Source: Hindawi journal article supplement (doi:10.1155/2017/2029315), 2017-01-01
Supplement: f1 [file 2029315.f1.pdf]

**Supplementary Figure 1.**

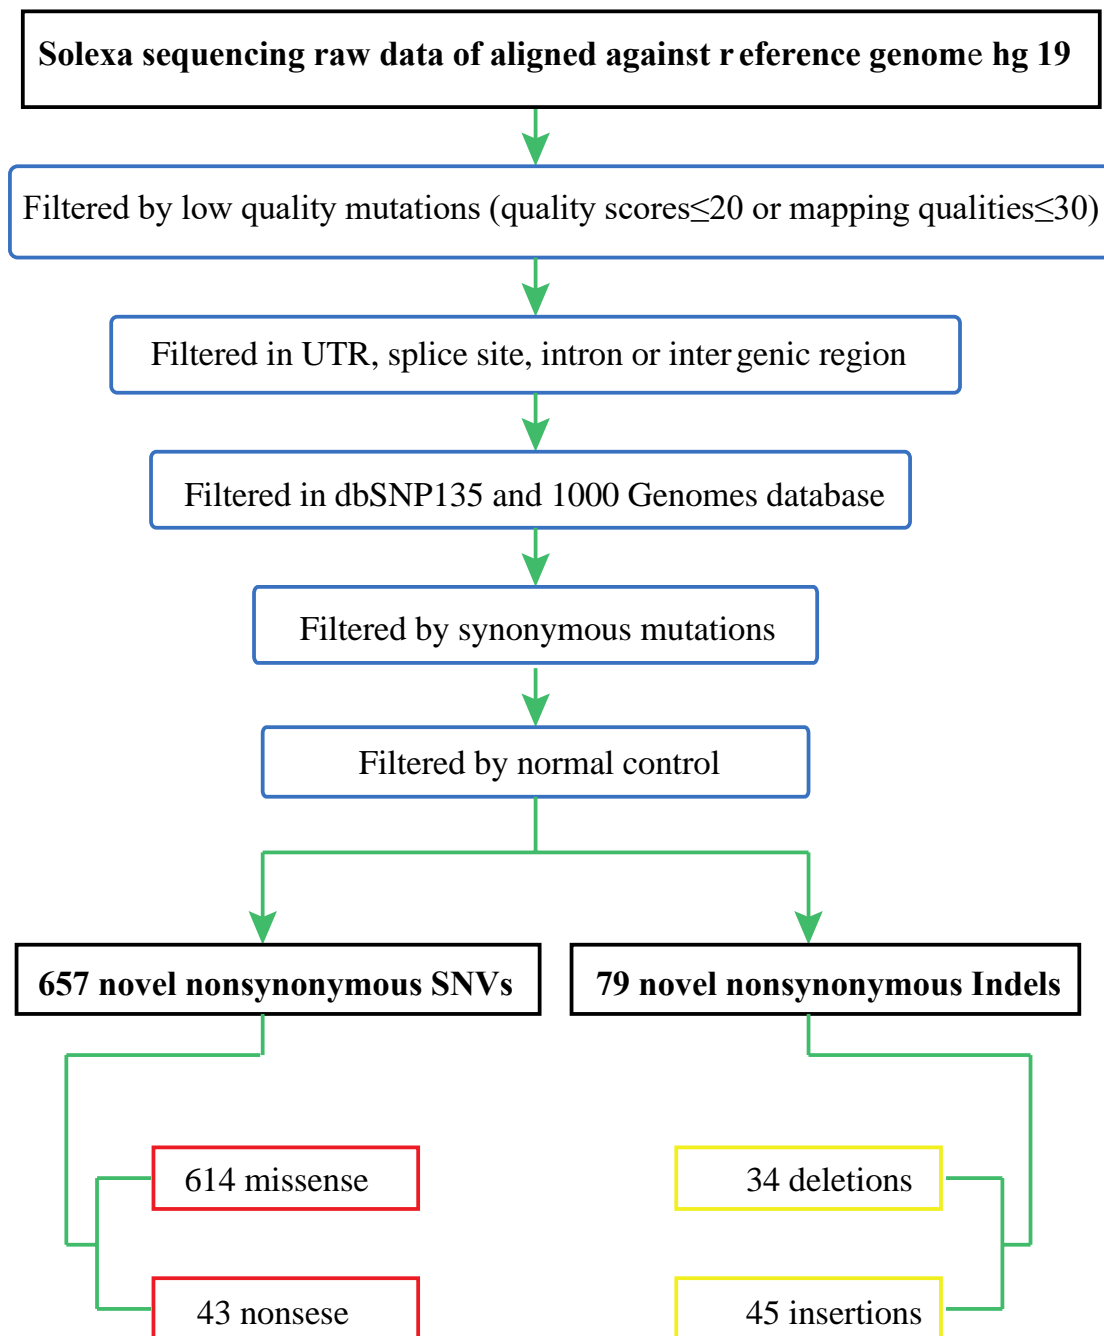

**Supplementary Figure 1.** The bioinformatic Flow chart for identification SNVs and Indels based on Illumina/Solexa sequencing. SNVs, single nucleotide variants; UTR, untranslated regions; dbSNP, single nucleotide polymorphism database; Indels, small insertions and deletions.

**Supplementary Table 1.** Summary of exome sequence analysis of 5 hepatocellular carcinomas

| Patient ID                 | Patient 1  |               | Patient 2  |               | Patient 3  |               | Patient 4  |               | Patient 5  |               | Averages    |
|----------------------------|------------|---------------|------------|---------------|------------|---------------|------------|---------------|------------|---------------|-------------|
|                            | Normal     | Primary tumor | Normal     | Primary tumor | Normal     | Primary tumor | Normal     | Primary tumor | Normal     | Primary tumor |             |
| Mapped Reads               | 67645664   | 72572267      | 72860802   | 84790105      | 83467110   | 80348956      | 59187866   | 74356456      | 65032298   | 66235825      | 73284927.25 |
| Uniquely Mapped Reads      | 59732803   | 64036098      | 62037691   | 66346437      | 71163666   | 68312401      | 51978725   | 65534482      | 57108450   | 58472950      | 62619350.25 |
| Uniq/Mapped                | 0.8830249  | 0.882377      | 0.851455   | 0.782479      | 0.8525953  | 0.8501965     | 0.878199   | 0.8813556     | 0.8781552  | 0.8827995     | 0.857154388 |
| Less than 2 mismatch(Good) | 59732803   | 64036098      | 62037650   | 66346437      | 71163629   | 68312335      | 51978725   | 65534482      | 57108450   | 58472950      | 62619332.25 |
| Good/Uniq                  | 1          | 1             | 0.9999993  | 1             | 0.9999995  | 0.999999      | 1          | 1             | 1          | 1             | 0.999999725 |
| Reads In Target            | 47144439   | 49994664      | 48143139   | 51422166      | 55474802   | 52582294      | 40684668   | 48678700      | 44916061   | 45256206      | 48394754.5  |
| Reads In Target/Uniq       | 0.7892554  | 0.7807263     | 0.7760305  | 0.775055      | 0.7795383  | 0.7697328     | 0.7827177  | 0.7427952     | 0.7865046  | 0.7739682     | 0.773292788 |
| Median Depth               | 62         | 64            | 65         | 68            | 73         | 68            | 54         | 64            | 59         | 57            | 63.5        |
| Target area been covered   | 0.9551259  | 0.9563305     | 0.9594348  | 0.957385      | 0.9578073  | 0.959752      | 0.9532092  | 0.9564446     | 0.953398   | 0.9551003     | 0.9565664   |
| Bases In Target            | 3890943606 | 4118795544    | 3977836498 | 4250000000    | 4570763004 | 4353012495    | 3367085005 | 4015182136    | 3695382259 | 3725113573    | 3994296871  |
| Mean Depth in Target       | 78.71049   | 83.21479      | 80.10686   | 85.78198      | 92.2038    | 87.6333       | 68.25023   | 81.11174      | 74.88993   | 75.3579       | 80.6669675  |

**Abbreviation;** Uniq, Uniquely Mapped Reads.

**Supplementary Table 2.** The list of single-nucleotide variants discovered in five cases revealed by whole-exome sequencing

| Sample | Gene    | Gene ID        | Chromosome | Position  | Reference Base | Mutation Base | Convert Type | Mutation Type |
|--------|---------|----------------|------------|-----------|----------------|---------------|--------------|---------------|
| 2T     | ABCA12  | NM_173076.2    | chr2       | 215847037 | T              | C             | Arg1485Gly   | missense      |
| 5T     | ABCA13  | NM_152701.3    | chr7       | 48352694  | C              | T             | Leu3183Phe   | missense      |
| 4T     | ABCA3   | NM_001089.2    | chr16      | 2369715   | T              | G             | Tyr247Ser    | missense      |
| 5T     | ABCD4   | NM_005050.3    | chr14      | 74757027  | G              | A             | Arg432Trp    | missense      |
| 2T     | ABCG1   | NM_207627.1    | chr21      | 43710287  | T              | A             | Leu453Gln    | missense      |
| 1T     | ACAN    | NM_001135.3    | chr15      | 89401182  | C              | T             | Thr1789Ile   | missense      |
| 2T     | ACTL5T  | NM_006686.3    | chr9       | 111617055 | T              | C             | Ile386Val    | missense      |
| 5T     | ADAM22  | NM_021723.3    | chr7       | 87810873  | T              | C             | Ile821Thr    | missense      |
| 5T     | ADORA2T | NM_000676.2    | chr17      | 15878550  | G              | A             | Arg298His    | missense      |
| 2T     | AGAP10  | XM_001714786.4 | chr10      | 47192314  | G              | A             | Thr602Ile    | missense      |
| 3T     | AGBL5   | NM_021831.5    | chr2       | 27276868  | C              | G             | Cys164Trp    | missense      |
| 5T     | AJAP1   | NM_018836.3    | chr1       | 4772615   | A              | T             | Met229Leu    | missense      |
| 2T     | AK2     | NM_013411.4    | chr1       | 33486978  | T              | C             | Ile139Val    | missense      |
| 5T     | AKAP12  | NM_005100.3    | chr6       | 151671715 | C              | A             | Ala730Asp    | missense      |
| 5T     | AKAP4   | NM_003886.2    | chrX       | 49958910  | A              | T             | Ser152Thr    | missense      |
| 5T     | AKD1    | NM_001145128.2 | chr6       | 109993320 | T              | C             | Met78Val     | missense      |
| 3T     | ALB     | NM_000477.5    | chr4       | 74274473  | G              | A             | Asp145Asn    | missense      |

| Sample | Gene     | Gene ID        | Chromosome | Position  | Reference<br>Base | Mutation<br>Base | Convert<br>Type | Mutation<br>Type |
|--------|----------|----------------|------------|-----------|-------------------|------------------|-----------------|------------------|
| 5T     | ALG1T    | NM_001013620.3 | chr12      | 38714723  | A                 | T                | Tyr377Phe       | missense         |
| 2T     | ALPP     | NM_001632.3    | chr2       | 233245199 | A                 | T                | Met288Leu       | missense         |
| 2T     | ALPPL2   | NM_031313.2    | chr2       | 233273280 | A                 | T                | Met285Leu       | missense         |
| 2T     | AMDHD2   | NM_001145815.1 | chr16      | 2580437   | T                 | G                | Trp488Gly       | missense         |
| 5T     | ANAPC4   | NM_013367.2    | chr4       | 25419260  | A                 | G                | Ile700Val       | missense         |
| 4T     | ANKS1A   | NM_015245.2    | chr6       | 35053703  | G                 | A                | Arg1098Lys      | missense         |
| 5T     | ANO6     | NM_001142679.1 | chr12      | 45803211  | A                 | T                | Gln651Leu       | missense         |
| 5T     | APOB     | NM_000384.2    | chr2       | 21233653  | T                 | A                | Leu2029Phe      | missense         |
| 3T     | ARHGEF28 | NM_001080479.2 | chr5       | 73136356  | A                 | T                | Thr400Ser       | missense         |
| 5T     | ATP6AP2  | NM_005765.2    | chrX       | 40460032  | A                 | T                | Ser253Cys       | missense         |
| 4T     | ATP6V1B1 | NM_001692.3    | chr2       | 71187145  | G                 | A                | Met174Ile       | missense         |
| 3T     | B3GNT7   | NM_145236.2    | chr2       | 232263268 | A                 | T                | Asn280Tyr       | missense         |
| 2T     | BCAT2    | NM_001190.3    | chr19      | 49303278  | C                 | T                | Gly164Asp       | missense         |
| 2T     | BCL11A   | NM_018014.3    | chr2       | 60688947  | G                 | C                | Pro367Arg       | missense         |
| 5T     | BDP1     | NM_018429.2    | chr5       | 70858175  | A                 | T                | Gln2524Leu      | missense         |
| 2T     | BRCA2    | NM_000059.3    | chr13      | 32914130  | A                 | T                | Asn1880Tyr      | missense         |
| 2T     | BRWD1    | NM_018963.4    | chr21      | 40585423  | T                 | A                | Gln1281Leu      | missense         |
| 5T     | C1orf53  | NM_024032.3    | chr17      | 42225320  | A                 | T                | Gln50Leu        | missense         |
| 2T     | C1orf116 | NM_023938.5    | chr1       | 207196159 | T                 | G                | Asp317Ala       | missense         |
| 4T     | C1orf68  | NM_001024679.2 | chr1       | 152692640 | T                 | A                | Cys215Ser       | missense         |
| 5T     | C2orf74  | NM_001143960.1 | chr2       | 61390277  | A                 | T                | Leu28Phe        | missense         |
| 4T     | C3       | NM_000064.2    | chr19      | 6707877   | C                 | G                | Gly637Arg       | missense         |
| 5T     | C5       | NM_001735.2    | chr9       | 123776235 | T                 | A                | Ile725Phe       | missense         |
| 1T     | CACNA1E  | NM_000721.3    | chr1       | 181706764 | G                 | A                | Val1176Ile      | missense         |
| 2T     | CACNA1S  | NM_000069.2    | chr1       | 201039431 | T                 | A                | Ser777Cys       | missense         |
| 5T     | CACNA2D3 | NM_018398.2    | chr3       | 54919557  | T                 | A                | Leu667Gln       | missense         |
| 4T     | CACNB1   | NM_000723.4    | chr17      | 37341056  | G                 | C                | Pro237Arg       | missense         |
| 2T     | CAPSL    | NM_144647.3    | chr5       | 35909985  | A                 | T                | Tyr170Asn       | missense         |
| 2T     | CARNS1   | NM_001166222.1 | chr11      | 67191118  | C                 | A                | His633Gln       | missense         |
| 2T     | CASP7    | NM_033340.3    | chr10      | 115457335 | G                 | A                | Arg28Gln        | missense         |
| 2T     | CASP8AP2 | NM_012115.3    | chr6       | 90576988  | A                 | T                | Ser1327Cys      | missense         |
| 5T     | CASQ2    | NM_001232.3    | chr1       | 116311062 | A                 | G                | Val34Ala        | missense         |
| 2T     | CCDC108  | NM_194302.2    | chr2       | 219873863 | T                 | A                | Gln1527Leu      | missense         |
| 2T     | CCDC114  | NM_144577.3    | chr19      | 48815274  | T                 | C                | Ile117Val       | missense         |
| 5T     | CCDC141  | NM_173648.3    | chr2       | 179839845 | A                 | T                | His155Gln       | missense         |
| 5T     | CCDC175  | NM_001164399.1 | chr14      | 60004858  | T                 | A                | Gln502His       | missense         |
| 3T     | CCDC73   | NM_001008391.2 | chr11      | 32635262  | A                 | T                | Ser868Thr       | missense         |
| 2T     | CCDC79   | NM_001136505.1 | chr16      | 66830682  | T                 | A                | Lys7Met         | missense         |
| 5T     | CCR4     | NM_005508.4    | chr3       | 32995557  | T                 | A                | Leu215Ile       | missense         |
| 5T     | CD164L2  | NM_207397.2    | chr1       | 27706604  | A                 | T                | Leu152Gln       | missense         |
| 5T     | CD300LD  | NM_001115152.1 | chr17      | 72584946  | T                 | A                | Asn28Ile        | missense         |
| 2T     | CDHR5    | NM_031264.3    | chr11      | 618051    | A                 | C                | Val480Gly       | missense         |

| Sample | Gene    | Gene ID        | Chromosome | Position  | Reference<br>Base | Mutation<br>Base | Convert<br>Type | Mutation<br>Type |
|--------|---------|----------------|------------|-----------|-------------------|------------------|-----------------|------------------|
| 2T     | CDK13   | NM_031267.3    | chr7       | 40127790  | G                 | T                | Gly1032Val      | missense         |
| 4T     | CDK17   | NM_001170464.2 | chr12      | 96707193  | T                 | C                | Glu108Gly       | missense         |
| 2T     | CENPK   | NM_001267038.1 | chr5       | 64847403  | T                 | C                | Lys77Glu        | missense         |
| 5T     | CEP85L  | NM_001178035.1 | chr6       | 118844968 | T                 | A                | Asp382Val       | missense         |
| 4T     | CFH     | NM_000186.3    | chr1       | 196697616 | A                 | G                | Ile793Val       | missense         |
| 2T     | CHD5    | NM_015557.2    | chr1       | 6202559   | T                 | A                | Gln717Leu       | missense         |
| 2T     | CHIT1   | NM_001256125.1 | chr1       | 203188878 | A                 | T                | Ser258Thr       | missense         |
| 3T     | CHRD12  | NM_015424.3    | chr11      | 74408263  | A                 | G                | Trp419Arg       | missense         |
| 5T     | CILP    | NM_003613.3    | chr15      | 65491375  | A                 | T                | Cys417Ser       | missense         |
| 4T     | CKAP4   | NM_006825.3    | chr12      | 106632912 | T                 | C                | Ile567Val       | missense         |
| 5T     | CLCN3   | NM_173872.3    | chr4       | 170625293 | A                 | T                | Thr570Ser       | missense         |
| 5T     | CLEC4F  | NM_001258027.1 | chr2       | 71043579  | T                 | A                | Asn312Tyr       | missense         |
| 5T     | CLIP2   | NM_032421.2    | chr7       | 73790701  | A                 | T                | Lys622Met       | missense         |
| 5T     | CLSTN2  | NM_022131.2    | chr3       | 140265416 | A                 | T                | Thr523Ser       | missense         |
| 5T     | CMPK2   | NM_001256478.1 | chr2       | 7001453   | G                 | T                | Pro285His       | missense         |
| 2T     | CNGB3   | NM_019098.4    | chr8       | 87616357  | A                 | G                | Val582Ala       | missense         |
| 5T     | CNR2    | NM_001841.2    | chr1       | 24201971  | A                 | T                | Leu46Gln        | missense         |
| 4T     | CNTF    | NM_000614.3    | chr11      | 58391631  | A                 | T                | Tyr80Phe        | missense         |
| 5T     | COA6    | NM_001012985.2 | chr1       | 234509574 | C                 | A                | Ser37Tyr        | missense         |
| 2T     | COL11A2 | NM_080681.2    | chr6       | 33132099  | T                 | C                | Asp1586Gly      | missense         |
| 5T     | COL4A6  | NM_001847.2    | chrX       | 107457397 | T                 | A                | Gln130Leu       | missense         |
| 5T     | COL5A1  | NM_000093.3    | chr9       | 137713952 | G                 | T                | Gly1522Cys      | missense         |
| 5T     | COL6A3  | NM_004369.3    | chr2       | 238270466 | A                 | C                | Ile2024Met      | missense         |
| 5T     | COL6A3  | NM_004369.3    | chr2       | 238277313 | T                 | A                | Glu1598Val      | missense         |
| 5T     | COL6A5  | NM_153264.5    | chr3       | 130159321 | A                 | G                | Thr2047Ala      | missense         |
| 3T     | COL7A1  | NM_000094.3    | chr3       | 48621194  | C                 | A                | Gly1433Val      | missense         |
| 1T     | COMMD7  | NM_001099339.1 | chr20      | 31294506  | C                 | A                | Gly99Cys        | missense         |
| 5T     | COPS5   | NM_006837.2    | chr8       | 67963508  | T                 | C                | Asn243Ser       | missense         |
| 5T     | CR1L    | NM_175710.1    | chr1       | 207868029 | A                 | T                | Lys265Asn       | missense         |
| 4T     | CRADD   | NM_003805.3    | chr12      | 94243823  | A                 | T                | Arg126Trp       | missense         |
| 5T     | CRHR1   | NM_001256299.1 | chr17      | 43911202  | T                 | A                | Leu176Gln       | missense         |
| 5T     | CRHR2   | NM_001202475.1 | chr7       | 30693080  | A                 | T                | Val438Glu       | missense         |
| 2T     | CRTC3   | NM_001042574.2 | chr15      | 91147646  | A                 | T                | His148Leu       | missense         |
| 2T     | CSMD1   | NM_033225.5    | chr8       | 3265724   | C                 | A                | Ala590Ser       | missense         |
| 2T     | CSPG5   | NM_001206945.1 | chr3       | 47604141  | T                 | A                | Lys412Asn       | missense         |
| 5T     | CTBP2   | NM_001083914.1 | chr10      | 126691999 | C                 | T                | Gly41Ser        | missense         |
| 5T     | CTSL1   | NM_145918.2    | chr9       | 90343504  | A                 | T                | Gln134Leu       | missense         |
| 5T     | CTU2    | NM_001012762.1 | chr16      | 88776369  | T                 | G                | Val56Gly        | missense         |
| 4T     | CUBN    | NM_001081.3    | chr10      | 16996493  | C                 | T                | Glu1584Lys      | missense         |
| 5T     | CYFIP1  | NM_014608.2    | chr15      | 22933656  | A                 | T                | Gln222Leu       | missense         |
| 5T     | CYLD    | NM_015247.2    | chr16      | 50825480  | A                 | C                | Gln707Pro       | missense         |
| 4T     | CYP2F1  | NM_000774.3    | chr19      | 41633809  | G                 | A                | Arg433His       | missense         |

| Sample | Gene      | Gene ID        | Chromosome | Position  | Reference<br>Base | Mutation<br>Base | Convert<br>Type | Mutation<br>Type |
|--------|-----------|----------------|------------|-----------|-------------------|------------------|-----------------|------------------|
| 4T     | CYP4F11   | NM_021187.3    | chr19      | 16033183  | T                 | C                | Met326Val       | missense         |
| 2T     | DAZ1      | NM_004081.5    | chrY       | 25308542  | G                 | T                | Pro553Gln       | missense         |
| 2T     | DAZ2      | NM_001005785.2 | chrY       | 25380604  | C                 | A                | Pro223Gln       | missense         |
| 2T     | DAZ3      | NM_020364.3    | chrY       | 26944616  | G                 | T                | Pro223Gln       | missense         |
| 2T     | DAZ4      | NM_020420.3    | chrY       | 27005838  | C                 | A                | Pro223Gln       | missense         |
| 5T     | DBF4      | NM_006716.3    | chr7       | 87537275  | A                 | T                | Asn608Tyr       | missense         |
| 4T     | DCAF12L2  | NM_001013628.2 | chrX       | 125298898 | C                 | T                | Arg337His       | missense         |
| 4T     | DCC       | NM_005215.3    | chr18      | 50705426  | T                 | A                | Tyr505Asn       | missense         |
| 3T     | DCDC2T    | NM_001099434.1 | chr1       | 32678374  | T                 | A                | Ser232Thr       | missense         |
| 5T     | DCHS2     | NM_001142552.1 | chr4       | 155298524 | A                 | T                | Tyr709Asn       | missense         |
| 4T     | DCLRE1CP1 | XM_002342972.1 | chr10      | 15057454  | A                 | T                | Leu102Gln       | missense         |
| 5T     | DDC       | NM_001082971.1 | chr7       | 50571745  | G                 | C                | Leu243Val       | missense         |
| 2T     | DDHD1     | NM_001160147.1 | chr14      | 53558512  | T                 | C                | Asn434Ser       | missense         |
| 2T     | DEK       | NM_003472.3    | chr6       | 18258248  | A                 | T                | Leu98Gln        | missense         |
| 4T     | DEPDC1    | NM_017779.4    | chr1       | 68960320  | T                 | A                | His36Leu        | missense         |
| 5T     | DIDO1     | NM_033081.2    | chr20      | 61522506  | T                 | A                | Glu1116Val      | missense         |
| 5T     | DIRAS1    | NM_145173.3    | chr19      | 2717398   | T                 | A                | Gln136Leu       | missense         |
| 4T     | DISC1     | NM_001164549.1 | chr1       | 231906660 | A                 | T                | Gln493Leu       | missense         |
| 4T     | DMD       | NM_000109.3    | chrX       | 32834714  | G                 | T                | Thr126Asn       | missense         |
| 1T     | DMRT1     | NM_021951.2    | chr9       | 968077    | T                 | C                | Cys354Arg       | missense         |
| 4T     | DNAH11    | NM_003777.3    | chr7       | 21847619  | T                 | C                | Ser3436Pro      | missense         |
| 5T     | DNAH17    | NM_173628.3    | chr17      | 76454758  | A                 | C                | Leu3289Arg      | missense         |
| 4T     | DNAH17    | NM_173628.3    | chr17      | 76557998  | T                 | A                | Tyr545Phe       | missense         |
| 4T     | DNAH5     | NM_001369.2    | chr5       | 13708416  | G                 | A                | Pro4385Leu      | missense         |
| 5T     | DNAH9     | NM_001372.3    | chr17      | 11592983  | T                 | A                | Phe1282Ile      | missense         |
| 3T     | DNAJC16   | NM_015291.2    | chr1       | 15890443  | G                 | A                | Arg453His       | missense         |
| 1T     | DNAJC6    | NM_001256865.1 | chr1       | 65867465  | A                 | G                | Lys640Arg       | missense         |
| 5T     | DNM1      | NM_001005336.1 | chr9       | 130984835 | A                 | T                | Asn363Ile       | missense         |
| 4T     | DNMBP     | NM_015221.2    | chr10      | 101715862 | C                 | A                | Ala457Ser       | missense         |
| 2T     | DOCK3     | NM_004947.4    | chr3       | 51264786  | A                 | T                | Ser484Cys       | missense         |
| 5T     | DOCK8     | NM_203447.3    | chr9       | 420425    | A                 | T                | Asn1289Tyr      | missense         |
| 2T     | DOCK9     | NM_015296.2    | chr13      | 99550460  | T                 | C                | Tyr521Cys       | missense         |
| 2T     | DPP10     | NM_020868.3    | chr2       | 116572444 | T                 | A                | Asp592Glu       | missense         |
| 5T     | DPPA4     | NM_018189.3    | chr3       | 109049382 | T                 | A                | Gln223Leu       | missense         |
| 2T     | DROSHA    | NM_013235.4    | chr5       | 31511262  | T                 | A                | Thr438Ser       | missense         |
| 2T     | DSC1      | NM_024421.2    | chr18      | 28721992  | A                 | T                | Asn410Lys       | missense         |
| 5T     | DST       | NM_015548.4    | chr6       | 56335990  | C                 | A                | Arg4789Leu      | missense         |
| 5T     | DUX4      | NM_033178.2    | chr4       | 191006807 | A                 | T                | Glu475Val       | missense         |
| 5T     | DZIP3     | NM_014648.3    | chr3       | 108366878 | G                 | T                | Glu627Asp       | missense         |
| 5T     | EEA1      | NM_003566.3    | chr12      | 93196191  | T                 | C                | Ile887Val       | missense         |
| 1T     | EEF1A1    | NM_001402.5    | chr6       | 74229205  | A                 | G                | Leu60Ser        | missense         |
| 3T     | EEF1A2    | NM_001958.3    | chr20      | 62121960  | C                 | T                | Glu301Lys       | missense         |

| Sample | Gene    | Gene ID        | Chromosome | Position  | Reference<br>Base | Mutation<br>Base | Convert<br>Type | Mutation<br>Type |
|--------|---------|----------------|------------|-----------|-------------------|------------------|-----------------|------------------|
| 5T     | EMB     | NM_198449.2    | chr5       | 49701574  | A                 | T                | Ser195Arg       | missense         |
| 4T     | EMC3    | NM_018447.2    | chr3       | 10005842  | C                 | T                | Ala233Thr       | missense         |
| 2T     | ENAM    | NM_031889.2    | chr4       | 71508252  | A                 | C                | Gln370Pro       | missense         |
| 4T     | EPHA1   | NM_005232.4    | chr7       | 143092248 | A                 | C                | Phe704Cys       | missense         |
| 5T     | EPHA6   | NM_001080448.2 | chr3       | 97356838  | T                 | A                | Leu899Gln       | missense         |
| 5T     | ERMN    | NM_001009959.1 | chr2       | 158182036 | A                 | T                | Leu53Gln        | missense         |
| 4T     | EXT2    | NM_000401.3    | chr11      | 44129243  | A                 | T                | Glu27Val        | missense         |
| 5T     | EYS     | NM_001142800.1 | chr6       | 65327357  | A                 | T                | Met1213Lys      | missense         |
| 5T     | EYS     | NM_001142800.1 | chr6       | 66044877  | G                 | A                | Pro588Ser       | missense         |
| 5T     | FAM124A | NM_145019.3    | chr13      | 51854859  | G                 | A                | Gly406Ser       | missense         |
| 4T     | FAM134C | NM_178126.3    | chr17      | 40739858  | T                 | G                | Asn124Thr       | missense         |
| 5T     | FAM13A  | NM_014883.3    | chr4       | 89711773  | T                 | A                | His352Leu       | missense         |
| 5T     | FAM198B | NM_001031700.2 | chr4       | 159048658 | T                 | A                | Gln495His       | missense         |
| 5T     | FAM58BP | NM_001105517.1 | chr1       | 200183089 | T                 | A                | Leu133Gln       | missense         |
| 5T     | FAT2    | NM_001447.2    | chr5       | 150922378 | A                 | T                | His2770Gln      | missense         |
| 3T     | FBF1    | NM_001080542.1 | chr17      | 73929103  | A                 | T                | Met33Lys        | missense         |
| 5T     | FLT1    | NM_002019.4    | chr13      | 29012453  | T                 | A                | Ser140Cys       | missense         |
| 5T     | FLT3    | NM_004119.2    | chr13      | 28623523  | A                 | C                | Val345Gly       | missense         |
| 2T     | FMO1    | NM_002021.1    | chr1       | 171252338 | A                 | T                | Lys413Asn       | missense         |
| 5T     | FOLR4   | NM_001199206.1 | chr11      | 94039854  | C                 | T                | Pro105Leu       | missense         |
| 5T     | FOLR4   | NM_001199206.1 | chr11      | 94039796  | T                 | A                | Cys86Ser        | missense         |
| 2T     | FOXN1   | NM_003593.2    | chr17      | 26862078  | A                 | C                | Thr497Pro       | missense         |
| 5T     | FOXP2   | NM_014491.3    | chr7       | 114174760 | A                 | T                | Gln86Leu        | missense         |
| 5T     | FPR1    | NM_001193306.1 | chr19      | 52249387  | A                 | T                | Ser287Arg       | missense         |
| 5T     | FRAS1   | NM_025074.6    | chr4       | 79394648  | A                 | T                | Met2527Leu      | missense         |
| 2T     | FRMD7   | NM_194277.2    | chrX       | 131228165 | T                 | G                | Tyr96Ser        | missense         |
| 4T     | FRRS1   | NM_001013660.2 | chr1       | 100181207 | T                 | A                | Thr420Ser       | missense         |
| 4T     | FSTL1   | NM_007085.4    | chr3       | 120128461 | T                 | A                | Gln127Leu       | missense         |
| 4T     | FZD10   | NM_007197.3    | chr12      | 130648716 | C                 | T                | Thr410Met       | missense         |
| 2T     | GABPB2  | NM_144618.2    | chr1       | 151089873 | A                 | T                | Thr310Ser       | missense         |
| 4T     | GALNT13 | NM_052917.2    | chr2       | 155157974 | A                 | T                | His343Leu       | missense         |
| 2T     | GARNL3  | NM_032293.4    | chr9       | 130155519 | A                 | G                | Ile1010Val      | missense         |
| 5T     | GCAT    | NM_001171690.1 | chr22      | 38208984  | G                 | T                | Gly166Cys       | missense         |
| 5T     | GCNT4   | NM_016591.2    | chr5       | 74324571  | T                 | A                | Gln431Leu       | missense         |
| 2T     | GDF6    | NM_001001557.2 | chr8       | 97172832  | G                 | A                | Ser30Phe        | missense         |
| 2T     | GGT2    | XM_003846303.1 | chr22      | 21567365  | C                 | T                | Asp342Asn       | missense         |
| 2T     | GIT2    | NM_057169.3    | chr12      | 110383065 | C                 | A                | Arg577Ser       | missense         |
| 2T     | GJB2    | NM_004004.5    | chr13      | 20763525  | C                 | T                | Asp66Asn        | missense         |
| 5T     | GLI2    | NM_005270.4    | chr2       | 121748249 | T                 | A                | ***1587Lys      | missense         |
| 5T     | GLI3    | NM_000168.5    | chr7       | 42004682  | T                 | A                | Asp1330Val      | missense         |
| 5T     | GON4L   | NM_001037533.1 | chr1       | 155786014 | T                 | A                | Asn352Tyr       | missense         |
| 5T     | GPAM    | NM_020918.5    | chr10      | 113933521 | C                 | T                | Val166Met       | missense         |

| Sample | Gene     | Gene ID        | Chromosome | Position  | Reference<br>Base | Mutation<br>Base | Convert<br>Type | Mutation<br>Type |
|--------|----------|----------------|------------|-----------|-------------------|------------------|-----------------|------------------|
| 5T     | GPR18    | NM_001098200.1 | chr13      | 99907901  | G                 | A                | Pro76Ser        | missense         |
| 3T     | GPR37    | NM_005302.2    | chr7       | 124386752 | T                 | A                | Ser557Cys       | missense         |
| 5T     | GPR82    | NM_080817.4    | chrX       | 41587169  | T                 | A                | Leu297His       | missense         |
| 5T     | GPR98    | NM_032119.3    | chr5       | 90040905  | G                 | C                | Cys3531Ser      | missense         |
| 5T     | GPR98    | NM_032119.3    | chr5       | 90040895  | G                 | T                | Ala3528Ser      | missense         |
| 4T     | GPRC6A   | NM_148963.2    | chr6       | 117114150 | T                 | A                | Ser646Cys       | missense         |
| 1T     | GRHL1    | NM_198182.2    | chr2       | 10095090  | C                 | T                | Arg23Trp        | missense         |
| 5T     | GRM7     | NM_181874.2    | chr3       | 7620328   | A                 | T                | Ile579Phe       | missense         |
| 4T     | GTF2A1   | NM_201595.2    | chr14      | 81670430  | T                 | A                | Met12Leu        | missense         |
| 5T     | GTF2H4   | NM_001517.4    | chr6       | 30876821  | G                 | T                | Ser3Ile         | missense         |
| 5T     | GTF3C1   | NM_001520.3    | chr16      | 27509997  | T                 | C                | Ile707Val       | missense         |
| 4T     | GUSB     | NM_000181.3    | chr7       | 65444505  | T                 | C                | Gln202Arg       | missense         |
| 2T     | HAPLN3   | NM_178232.2    | chr15      | 89424716  | C                 | T                | Arg122Gln       | missense         |
| 4T     | HCAR3    | NM_006018.2    | chr12      | 123200723 | A                 | C                | Trp188Gly       | missense         |
| 5T     | HECTD1   | NM_015382.2    | chr14      | 31582610  | T                 | G                | Leu1979Phe      | missense         |
| 5T     | HECTD2   | NM_182765.3    | chr10      | 93220217  | G                 | A                | Arg101Lys       | missense         |
| 5T     | HEMGN    | NM_018437.3    | chr9       | 100700380 | A                 | T                | His13Gln        | missense         |
| 5T     | HEPH     | NM_138737.3    | chrX       | 65420426  | T                 | A                | Cys691Ser       | missense         |
| 5T     | HHLA2    | NM_007072.2    | chr3       | 108081293 | G                 | A                | Ala370Thr       | missense         |
| 5T     | HIBADH   | NM_152740.3    | chr7       | 27565891  | T                 | A                | Tyr318Phe       | missense         |
| 5T     | HK3      | NM_002115.2    | chr5       | 176318406 | G                 | A                | Ser81Phe        | missense         |
| 2T     | HMGCS2   | NM_001166107.1 | chr1       | 120311383 | G                 | A                | Leu29Phe        | missense         |
| 4T     | HOXC10   | NM_017409.3    | chr12      | 54379192  | C                 | A                | Ala50Glu        | missense         |
| 4T     | HOXD8    | NM_001199746.1 | chr2       | 176995464 | T                 | A                | Cys124Ser       | missense         |
| 5T     | HRC      | NM_002152.2    | chr19      | 49657139  | A                 | T                | His452Gln       | missense         |
| 5T     | HS3ST2   | NM_006043.1    | chr16      | 22926554  | A                 | T                | Ser259Cys       | missense         |
| 1T     | HS3ST3A1 | NM_006042.1    | chr17      | 13504386  | T                 | C                | Ile21Val        | missense         |
| 2T     | HSDL2    | NM_001195822.1 | chr9       | 115216360 | A                 | T                | Glu238Asp       | missense         |
| 5T     | HSFX1    | NM_016153.2    | chrX       | 148856862 | C                 | T                | Arg175Cys       | missense         |
| 5T     | HSFX2    | NM_001164415.1 | chrX       | 148675838 | G                 | A                | Arg175Cys       | missense         |
| 5T     | HSFY1    | NM_033108.2    | chrY       | 20709873  | C                 | A                | Ala241Asp       | missense         |
| 5T     | HSFY2    | NM_153716.1    | chrY       | 20934305  | G                 | T                | Ala241Asp       | missense         |
| 2T     | HSPA2    | NM_021979.3    | chr14      | 65007614  | A                 | T                | Tyr16Phe        | missense         |
| 2T     | HTR6     | NM_000871.1    | chr1       | 20005493  | A                 | G                | Ile319Val       | missense         |
| 5T     | HVCN1    | NM_001256413.1 | chr12      | 111089121 | A                 | T                | Phe162Ile       | missense         |
| 5T     | IARS     | NM_002161.4    | chr9       | 94985694  | T                 | A                | Ile1163Phe      | missense         |
| 4T     | IBTK     | NM_015525.2    | chr6       | 82920555  | T                 | A                | Thr829Ser       | missense         |
| 2T     | IDH2     | NM_002168.2    | chr15      | 90627553  | G                 | T                | Thr435Lys       | missense         |
| 4T     | Ighv1-58 | IGHV1-58       | chr14      | 107078491 | T                 | C                | Asn78Ser        | missense         |
| 1T     | IGSF3    | NM_001542.2    | chr1       | 117146585 | G                 | A                | Arg449Cys       | missense         |
| 4T     | IL1B     | NM_000576.2    | chr2       | 113588132 | A                 | T                | Tyr206Asn       | missense         |
| 5T     | IL4R     | NM_001257997.1 | chr16      | 27374766  | A                 | T                | Gln538Leu       | missense         |

| Sample | Gene      | Gene ID        | Chromosome | Position  | Reference<br>Base | Mutation<br>Base | Convert<br>Type | Mutation<br>Type |
|--------|-----------|----------------|------------|-----------|-------------------|------------------|-----------------|------------------|
| 2T     | INADL     | NM_176877.2    | chr1       | 62228831  | A                 | G                | Ile57Val        | missense         |
| 2T     | INMT      | NM_001199219.1 | chr7       | 30793553  | A                 | T                | Ser120Cys       | missense         |
| 4T     | IPO11     | NM_016338.4    | chr5       | 61779876  | T                 | C                | Met354Thr       | missense         |
| 2T     | IREB2     | NM_004136.2    | chr15      | 78782801  | A                 | T                | Asp705Val       | missense         |
| 2T     | ISLR2     | NM_001130136.1 | chr15      | 74425160  | A                 | T                | Glu22Val        | missense         |
| 4T     | ITGA8     | NM_003638.1    | chr10      | 15559209  | T                 | A                | Glu1047Val      | missense         |
| 2T     | ITIH3     | NM_002217.3    | chr3       | 52835020  | A                 | T                | Asn414Ile       | missense         |
| 4T     | ITK       | NM_005546.3    | chr5       | 156635906 | C                 | A                | Arg49Ser        | missense         |
| 1T     | ITPR3     | NM_002224.3    | chr6       | 33636859  | G                 | T                | Glu705Asp       | missense         |
| 1T     | ITPR3     | NM_002224.3    | chr6       | 33636860  | A                 | G                | Lys706Glu       | missense         |
| 4T     | JAG2      | NM_002226.4    | chr14      | 105609472 | C                 | A                | Val1093Leu      | missense         |
| 2T     | KAL1      | NM_000216.2    | chrX       | 8522042   | G                 | T                | Phe435Leu       | missense         |
| 4T     | KAT2A     | NM_021078.2    | chr17      | 40269496  | A                 | C                | Val516Gly       | missense         |
| 5T     | KCNC2     | NM_139136.3    | chr12      | 75444332  | C                 | T                | Ala485Thr       | missense         |
| 5T     | KCNG4     | NM_172347.2    | chr16      | 84255889  | A                 | T                | His498Gln       | missense         |
| 2T     | KCNMB1    | NM_004137.2    | chr5       | 169805957 | G                 | T                | Ser109Arg       | missense         |
| 1T     | KDM3T     | NM_016604.3    | chr5       | 137762930 | G                 | T                | Gly1519Cys      | missense         |
| 5T     | KDR       | NM_002253.2    | chr4       | 55948180  | A                 | T                | Leu1264His      | missense         |
| 5T     | KIAA0408  | NM_014702.4    | chr6       | 127771397 | T                 | A                | Glu79Val        | missense         |
| 5T     | KIAA0825  | NM_001145678.1 | chr5       | 93856414  | C                 | A                | Arg170Leu       | missense         |
| 5T     | KIAA0922  | NM_015196.3    | chr4       | 154507490 | A                 | T                | Ile480Phe       | missense         |
| 4T     | KIAA1715  | NM_030650.1    | chr2       | 176844586 | T                 | A                | Ile90Leu        | missense         |
| 1T     | KIF16B    | NM_001199865.1 | chr20      | 16360128  | T                 | C                | Glu840Gly       | missense         |
| 5T     | KIF18A    | NM_031217.3    | chr11      | 28119181  | T                 | C                | Tyr105Cys       | missense         |
| 3T     | KIF2T     | NM_032559.4    | chr17      | 51901982  | A                 | T                | Thr530Ser       | missense         |
| 5T     | KIF3C     | NM_002254.6    | chr2       | 26203838  | A                 | T                | Tyr317Asn       | missense         |
| 4T     | KIR2DS4   | NM_012314.3    | chr19      | 55351072  | G                 | T                | Gly187Val       | missense         |
| 5T     | KIRREL2   | NM_199179.2    | chr19      | 36349762  | A                 | T                | His123Leu       | missense         |
| 5T     | KLHL33    | NM_001109997.2 | chr14      | 20897961  | T                 | A                | Thr292Ser       | missense         |
| 5T     | KLHL40    | NM_152393.2    | chr3       | 42729779  | T                 | A                | Met433Lys       | missense         |
| 3T     | KRT12     | NM_000223.3    | chr17      | 39023072  | C                 | T                | Gly123Arg       | missense         |
| 5T     | KRT2      | NM_000423.2    | chr12      | 53042069  | A                 | G                | Met337Thr       | missense         |
| 4T     | KRT33A    | NM_004138.3    | chr17      | 39506947  | T                 | G                | Ser25Arg        | missense         |
| 1T     | KRTAP11-1 | NM_175858.2    | chr21      | 32253626  | C                 | A                | Arg73Leu        | missense         |
| 1T     | KRTCAP3   | NM_001168364.1 | chr2       | 27666029  | T                 | C                | Val121Ala       | missense         |
| 5T     | L3MBTL1   | NM_032107.4    | chr20      | 42164528  | A                 | C                | Tyr604Ser       | missense         |
| 3T     | LAMA1     | NM_005559.3    | chr18      | 7037735   | C                 | T                | Gly527Arg       | missense         |
| 2T     | LAMA2     | NM_000426.3    | chr6       | 129674494 | A                 | T                | Glu1570Val      | missense         |
| 2T     | LAMA3     | NM_198129.1    | chr18      | 21530076  | G                 | A                | Gly3199Arg      | missense         |
| 4T     | LAMB1     | NM_002291.2    | chr7       | 107626482 | T                 | A                | Ser221Cys       | missense         |
| 2T     | LAMC1     | NM_002293.3    | chr1       | 183091228 | G                 | C                | Gly748Ala       | missense         |
| 5T     | LAMP3     | NM_014398.3    | chr3       | 182871697 | T                 | C                | Lys178Glu       | missense         |



| Sample | Gene         | Gene ID        | Chromosome | Position  | Reference<br>Base | Mutation<br>Base | Convert<br>Type | Mutation<br>Type |
|--------|--------------|----------------|------------|-----------|-------------------|------------------|-----------------|------------------|
| 5T     | LCE3E        | NM_178435.2    | chr1       | 152538480 | T                 | A                | Asn69Tyr        | missense         |
| 2T     | LCP2         | NM_005565.3    | chr5       | 169693876 | G                 | T                | Asp236Glu       | missense         |
| 5T     | LDB1         | NM_001113407.1 | chr10      | 103870305 | C                 | T                | Gly169Asp       | missense         |
| 3T     | LILRA6       | NM_024318.2    | chr19      | 54744797  | A                 | T                | Ser289Thr       | missense         |
| 4T     | LIMS3        | NM_033514.4    | chr2       | 110660898 | C                 | A                | Thr84Lys        | missense         |
| 4T     | LMAN1L       | NM_021819.2    | chr15      | 75112440  | G                 | T                | Glu258Asp       | missense         |
| 4T     | LMLN         | NM_033029.3    | chr3       | 197707210 | A                 | T                | Tyr188Phe       | missense         |
| 3T     | LOC100287294 | XM_002342726.2 | chr7       | 57009074  | G                 | C                | Ser77Cys        | missense         |
| 3T     | LOC402269    | XM_377941.7    | chr7       | 63095970  | C                 | G                | Ser77Cys        | missense         |
| 2T     | LOC642643    | XM_003403485.1 | chr22      | 18721555  | G                 | T                | Gly6Cys         | missense         |
| 2T     | LOC728888    | XM_002343430.4 | chr16      | 29401427  | T                 | G                | Lys127Thr       | missense         |
| 2T     | LPHN3        | NM_015236.4    | chr4       | 62897177  | C                 | A                | Ala1079Glu      | missense         |
| 4T     | LRFN5        | NM_152447.3    | chr14      | 42356294  | T                 | A                | Tyr156Asn       | missense         |
| 5T     | LRP2         | NM_004525.2    | chr2       | 170103464 | T                 | A                | Asn981Tyr       | missense         |
| 2T     | LRRC33       | NM_198565.1    | chr3       | 196388375 | T                 | A                | Cys621Ser       | missense         |
| 5T     | LRRC35T      | NM_052888.2    | chr17      | 30349349  | A                 | T                | Glu395Val       | missense         |
| 2T     | LRRC4B       | NM_001080457.1 | chr19      | 51020935  | T                 | A                | Ser679Cys       | missense         |
| 5T     | LRRC52       | NM_001005214.3 | chr1       | 165514089 | T                 | A                | Trp186Arg       | missense         |
| 5T     | LRRK2        | NM_198578.3    | chr12      | 40745356  | A                 | T                | Asn2133Tyr      | missense         |
| 5T     | LRRTM1       | NM_178839.4    | chr2       | 80529549  | T                 | A                | Thr466Ser       | missense         |
| 2T     | MACC1        | NM_182762.3    | chr7       | 20199394  | G                 | T                | Thr197Lys       | missense         |
| 5T     | MAGEB5       | XM_003846439.1 | chrX       | 26236211  | A                 | T                | Arg313Trp       | missense         |
| 5T     | MAGI3        | NM_001142782.1 | chr1       | 114225699 | A                 | C                | Lys1170Thr      | missense         |
| 2T     | MAN2C1       | NM_006715.3    | chr15      | 75656903  | C                 | T                | Ala176Thr       | missense         |
| 2T     | MAP2         | NM_002374.3    | chr2       | 210560692 | G                 | C                | Arg1266Ser      | missense         |
| 5T     | MAP3K19      | NM_025052.3    | chr2       | 135745799 | A                 | T                | Leu215Met       | missense         |
| 5T     | MAP7D3       | NM_001173516.1 | chrX       | 135326810 | T                 | G                | Gln115Pro       | missense         |
| 5T     | MAST4        | NM_001164664.1 | chr5       | 66462193  | A                 | T                | Ser2396Cys      | missense         |
| 3T     | MAX          | NM_145112.1    | chr14      | 65560436  | T                 | C                | Gln45Arg        | missense         |
| 4T     | MCM6         | NM_005915.5    | chr2       | 136616959 | C                 | A                | Ser425Ile       | missense         |
| 2T     | MDFI         | NM_005586.3    | chr6       | 41613983  | G                 | A                | Gly66Ser        | missense         |
| 5T     | MDN1         | NM_014611.1    | chr6       | 90395602  | T                 | A                | Gln3888Leu      | missense         |
| 5T     | MED12        | NM_005120.2    | chrX       | 70342071  | A                 | T                | Ser375Cys       | missense         |
| 5T     | MED17        | NM_004268.4    | chr11      | 93535071  | A                 | G                | Ile467Val       | missense         |
| 5T     | MEF2C        | NM_001131005.2 | chr5       | 88047839  | C                 | T                | Glu140Lys       | missense         |
| 1T     | MET          | NM_001127500.1 | chr7       | 116423433 | T                 | G                | Ser1254Arg      | missense         |
| 4T     | METTL11B     | NM_001136107.1 | chr1       | 170129724 | C                 | A                | Leu74Ile        | missense         |
| 1T     | METTL17      | NM_022734.2    | chr14      | 21464731  | C                 | T                | Arg376Trp       | missense         |
| 5T     | MFRP         | NM_031433.2    | chr11      | 119213336 | T                 | A                | Asn453Tyr       | missense         |
| 4T     | MGAM         | NM_004668.2    | chr7       | 141754622 | C                 | G                | Ser1076Arg      | missense         |
| 2T     | MINOS1       | NM_001032363.3 | chr1       | 19923540  | A                 | T                | Met1Leu         | missense         |
| 3T     | MKNK2        | NM_017572.3    | chr19      | 2037827   | A                 | C                | Trp386Gly       | missense         |

| Sample | Gene    | Gene ID        | Chromosome | Position  | Reference<br>Base | Mutation<br>Base | Convert<br>Type | Mutation<br>Type |
|--------|---------|----------------|------------|-----------|-------------------|------------------|-----------------|------------------|
| 5T     | MLL     | NM_001197104.1 | chr11      | 118355607 | A                 | T                | Met1417Leu      | missense         |
| 2T     | MLLT4   | NM_001207008.1 | chr6       | 168352601 | T                 | C                | Trp1499Arg      | missense         |
| 2T     | MMP10   | NM_002425.2    | chr11      | 102650307 | C                 | A                | Gly92Val        | missense         |
| 2T     | MMP27   | NM_022122.2    | chr11      | 102565741 | T                 | A                | Gln330His       | missense         |
| 5T     | MMS22L  | NM_198468.2    | chr6       | 97729122  | T                 | A                | His94Leu        | missense         |
| 5T     | MORC2   | NM_014941.1    | chr22      | 31335674  | T                 | A                | Gln274Leu       | missense         |
| 2T     | MPG     | NM_001015054.2 | chr16      | 135664    | T                 | G                | Val245Gly       | missense         |
| 4T     | MRGPRX1 | NM_147199.3    | chr11      | 18955433  | T                 | C                | Glu300Gly       | missense         |
| 5T     | MRPL14  | NM_032111.2    | chr6       | 44081884  | G                 | A                | Ala45Val        | missense         |
| 5T     | MSH3    | NM_002439.4    | chr5       | 80063903  | A                 | T                | Glu683Val       | missense         |
| 3T     | MST1    | NM_020998.3    | chr3       | 49724183  | C                 | G                | Glu261Gln       | missense         |
| 2T     | MTNR1B  | NM_005959.3    | chr11      | 92715191  | A                 | T                | Asn268Tyr       | missense         |
| 2T     | MUC16   | NM_024690.2    | chr19      | 9077617   | T                 | A                | Met3277Leu      | missense         |
| 5T     | MUC16   | NM_024690.2    | chr19      | 9057619   | A                 | G                | Ser9943Pro      | missense         |
| 5T     | MUC21   | NM_001010909.2 | chr6       | 30955136  | C                 | G                | Ser395Cys       | missense         |
| 5T     | MUC4    | NM_138297.4    | chr3       | 195488420 | A                 | T                | Met563Lys       | missense         |
| 5T     | MUC5AC  | XM_003403450.2 | chr11      | 1217632   | A                 | T                | Asp1308Val      | missense         |
| 5T     | MYBPH   | NM_004997.2    | chr1       | 203144741 | T                 | A                | Gln48Leu        | missense         |
| 5T     | MYCBP2  | NM_015057.4    | chr13      | 77631149  | A                 | C                | Phe4470Cys      | missense         |
| 5T     | MYH1    | NM_005963.3    | chr17      | 10400466  | G                 | A                | Arg1526Cys      | missense         |
| 5T     | MYH1    | NM_005963.3    | chr17      | 10397732  | T                 | A                | Gln1869Leu      | missense         |
| 4T     | MYH4    | NM_017533.2    | chr17      | 10359172  | T                 | A                | His672Leu       | missense         |
| 2T     | MYL10   | NM_138403.4    | chr7       | 101266339 | A                 | T                | Met96Lys        | missense         |
| 5T     | MYO10   | NM_012334.2    | chr5       | 16762217  | G                 | C                | Asn531Lys       | missense         |
| 5T     | MYO3A   | NM_017433.4    | chr10      | 26417420  | G                 | A                | Glu739Lys       | missense         |
| 2T     | MYO3T   | NM_138995.4    | chr2       | 171056760 | A                 | T                | His96Leu        | missense         |
| 1T     | MYO5A   | NM_000259.3    | chr15      | 52700306  | T                 | C                | Tyr263Cys       | missense         |
| 5T     | MYO5C   | NM_018728.3    | chr15      | 52527944  | T                 | C                | Gln962Arg       | missense         |
| 5T     | NAALAD2 | NM_005467.3    | chr11      | 89880640  | A                 | C                | Thr113Pro       | missense         |
| 5T     | NEB     | NM_001164507.1 | chr2       | 152527725 | A                 | T                | Tyr1440Asn      | missense         |
| 5T     | NEB     | NM_001164507.1 | chr2       | 152500450 | T                 | A                | Lys2613Met      | missense         |
| 4T     | NEDD4L  | NM_001243960.1 | chr18      | 56050528  | T                 | G                | Asn737Lys       | missense         |
| 5T     | NLGN1   | NM_014932.2    | chr3       | 173996939 | T                 | C                | Ile383Thr       | missense         |
| 5T     | NLRP10  | NM_176821.3    | chr11      | 7982162   | G                 | T                | Gln333Lys       | missense         |
| 5T     | NLRP2   | NM_001174081.1 | chr19      | 55512228  | T                 | A                | Trp1051Arg      | missense         |
| 4T     | NOS3    | NM_000603.4    | chr7       | 150707224 | T                 | G                | Val845Gly       | missense         |
| 3T     | NRCAM   | NM_005010.4    | chr7       | 107824881 | T                 | A                | Gln722Leu       | missense         |
| 2T     | NRP1    | NM_001244972.1 | chr10      | 33515124  | T                 | G                | Lys359Gln       | missense         |
| 2T     | NTNG1   | NM_001113226.1 | chr1       | 107866950 | A                 | T                | Glu98Val        | missense         |
| 3T     | NUP210  | NM_024923.2    | chr3       | 13401858  | C                 | T                | Ser689Asn       | missense         |
| 5T     | NUP88   | NM_002532.4    | chr17      | 5292263   | G                 | A                | Ala501Val       | missense         |
| 1T     | OASL    | NM_001261825.1 | chr12      | 121471398 | T                 | C                | Gln116Arg       | missense         |

| Sample | Gene    | Gene ID        | Chromosome | Position  | Reference<br>Base | Mutation<br>Base | Convert<br>Type | Mutation<br>Type |
|--------|---------|----------------|------------|-----------|-------------------|------------------|-----------------|------------------|
| 5T     | OBP2T   | NM_014581.2    | chr9       | 136082651 | T                 | A                | Gln117Leu       | missense         |
| 2T     | OBSCN   | NM_001098623.1 | chr1       | 228430947 | C                 | G                | Ala998Gly       | missense         |
| 5T     | OLFM4   | NM_006418.4    | chr13      | 53603008  | T                 | C                | Phe13Leu        | missense         |
| 4T     | OPN4    | NM_033282.3    | chr10      | 88417867  | G                 | T                | Gln123His       | missense         |
| 2T     | OR10A4  | NM_207186.2    | chr11      | 6897997   | T                 | C                | Leu40Ser        | missense         |
| 5T     | OR10H4  | NM_001004465.1 | chr19      | 16060382  | G                 | T                | Ala189Ser       | missense         |
| 5T     | OR11G2  | NM_001005503.1 | chr14      | 20665952  | T                 | A                | Leu153Gln       | missense         |
| 5T     | OR13G1  | NM_001005487.1 | chr1       | 247835680 | T                 | C                | Ile222Val       | missense         |
| 4T     | OR14A16 | NM_001001966.1 | chr1       | 247978737 | C                 | A                | Val99Phe        | missense         |
| 2T     | OR2AG1  | NM_001004489.2 | chr11      | 6806791   | A                 | T                | Arg175Trp       | missense         |
| 2T     | OR4C12  | NM_001005270.2 | chr11      | 50003429  | A                 | T                | Phe203Leu       | missense         |
| 5T     | OR51G2  | NM_001005238.1 | chr11      | 4936186   | C                 | A                | Arg236Ser       | missense         |
| 5T     | OR51S1  | NM_001004758.1 | chr11      | 4870126   | A                 | T                | Cys105Ser       | missense         |
| 2T     | OR52L1  | NM_001005173.2 | chr11      | 6007629   | G                 | T                | Pro178Thr       | missense         |
| 5T     | OR52N1  | NM_001001913.1 | chr11      | 5809163   | T                 | C                | Tyr295Cys       | missense         |
| 2T     | OR56B4  | NM_001005181.1 | chr11      | 6129860   | C                 | G                | His284Gln       | missense         |
| 3T     | OR4T2   | NM_001005566.2 | chr11      | 58189884  | T                 | C                | Asn284Ser       | missense         |
| 2T     | OR5D14  | NM_001004735.1 | chr11      | 55563546  | G                 | T                | Gly172Val       | missense         |
| 5T     | OR6B3   | NM_173351.1    | chr2       | 240985266 | G                 | C                | Ser75Cys        | missense         |
| 5T     | OR6C68  | NM_001005519.2 | chr12      | 55887023  | T                 | C                | Tyr288His       | missense         |
| 2T     | OR8J1   | NM_001005205.2 | chr11      | 56128113  | C                 | A                | Leu131Met       | missense         |
| 1T     | OR8K3   | NM_001005202.1 | chr11      | 56086072  | G                 | A                | Cys97Tyr        | missense         |
| 3T     | OTOGL   | NM_173591.3    | chr12      | 80651707  | A                 | T                | Gln596Leu       | missense         |
| 2T     | OTOP3   | NM_178233.1    | chr17      | 72943380  | T                 | G                | Leu477Arg       | missense         |
| 5T     | OTUD4   | NM_001102653.1 | chr4       | 146062554 | T                 | C                | Gln622Arg       | missense         |
| 4T     | P2RX1   | NM_002558.2    | chr17      | 3808612   | T                 | A                | Ser63Cys        | missense         |
| 2T     | P2RY1   | NM_002563.3    | chr3       | 152554274 | G                 | T                | Gly235Cys       | missense         |
| 3T     | P4HTM   | NM_177938.2    | chr3       | 49042521  | C                 | A                | Pro372Gln       | missense         |
| 4T     | PAPPA2  | NM_020318.2    | chr1       | 176661372 | A                 | T                | Ile848Phe       | missense         |
| 1T     | PARD3T  | NM_057177.6    | chr2       | 205986575 | C                 | A                | Pro356Gln       | missense         |
| 2T     | PARK7   | NM_007262.4    | chr1       | 8045007   | A                 | T                | Ser155Cys       | missense         |
| 4T     | PARVA   | NM_018222.4    | chr11      | 12499457  | G                 | A                | Glu161Lys       | missense         |
| 5T     | PAX6    | NM_001258462.1 | chr11      | 31811521  | A                 | T                | Ser424Arg       | missense         |
| 5T     | PBLD    | NM_022129.3    | chr10      | 70048315  | C                 | A                | Gly206Trp       | missense         |
| 2T     | PCDH15  | NM_001142772.1 | chr10      | 55566637  | G                 | A                | Ala1579Val      | missense         |
| 2T     | PCDHA2  | NM_031495.1    | chr5       | 140176141 | T                 | G                | Leu531Arg       | missense         |
| 2T     | PCDHA2  | NM_031495.1    | chr5       | 140176684 | T                 | A                | Val712Glu       | missense         |
| 5T     | PCDHB1  | NM_013340.2    | chr5       | 140431804 | A                 | T                | Gln250Leu       | missense         |
| 5T     | PCDHGA1 | NM_018912.2    | chr5       | 140711060 | A                 | T                | Asp270Val       | missense         |
| 1T     | PCDHGA8 | NM_014004.2    | chr5       | 140774533 | G                 | T                | Arg718Leu       | missense         |
| 2T     | PCDHGB5 | NM_032099.1    | chr5       | 140778787 | A                 | T                | Ile365Phe       | missense         |
| 4T     | PCLO    | NM_033026.5    | chr7       | 82545516  | T                 | A                | Gln3929Leu      | missense         |

| Sample | Gene     | Gene ID        | Chromosome | Position  | Reference<br>Base | Mutation<br>Base | Convert<br>Type | Mutation<br>Type |
|--------|----------|----------------|------------|-----------|-------------------|------------------|-----------------|------------------|
| 3T     | PCLO     | NM_033026.5    | chr7       | 82532009  | T                 | A                | Arg4496Trp      | missense         |
| 5T     | PCNXL3   | NM_032223.2    | chr11      | 65386239  | G                 | A                | Arg469Lys       | missense         |
| 5T     | PCSK5    | NM_001190482.1 | chr9       | 78854054  | A                 | T                | Thr1016Ser      | missense         |
| 2T     | PDE1C    | NM_001191057.1 | chr7       | 32109908  | C                 | T                | Gly33Glu        | missense         |
| 4T     | PDE1C    | NM_001191058.1 | chr7       | 31920370  | C                 | A                | Asp138Tyr       | missense         |
| 2T     | PDE3T    | NM_000922.3    | chr11      | 14839756  | A                 | C                | Asn517Thr       | missense         |
| 5T     | PDK4     | NM_002612.3    | chr7       | 95221870  | T                 | C                | His190Arg       | missense         |
| 5T     | PDZD11   | NM_016484.4    | chrX       | 69509172  | T                 | A                | Tyr7Phe         | missense         |
| 2T     | PEG10    | NM_015068.3    | chr7       | 94294422  | G                 | C                | ***518Tyr       | missense         |
| 5T     | PET112   | NM_004564.2    | chr4       | 152592445 | C                 | T                | Val519Met       | missense         |
| 4T     | PHC3     | NM_024947.3    | chr3       | 169815109 | A                 | C                | Leu966Arg       | missense         |
| 4T     | PHC3     | NM_024947.3    | chr3       | 169835203 | A                 | C                | Asp668Glu       | missense         |
| 2T     | PHF1     | NM_024165.2    | chr6       | 33382881  | A                 | G                | Gln400Arg       | missense         |
| 1T     | PIGV     | NM_017837.3    | chr1       | 27124270  | G                 | A                | Gly473Ser       | missense         |
| 3T     | PINK1    | NM_032409.2    | chr1       | 20974999  | C                 | G                | Asp375Glu       | missense         |
| 2T     | PITRM1   | NM_001242307.1 | chr10      | 3199129   | T                 | C                | Tyr492Cys       | missense         |
| 4T     | PLCB1    | NM_015192.2    | chr20      | 8665686   | C                 | A                | His324Asn       | missense         |
| 5T     | PLCB3    | NM_001184883.1 | chr11      | 64031516  | C                 | T                | Pro795Ser       | missense         |
| 2T     | PLCH1    | NM_014996.2    | chr3       | 155301409 | T                 | A                | Gln178Leu       | missense         |
| 2T     | PLEKHA5  | NM_019012.5    | chr12      | 19496356  | A                 | G                | Thr781Ala       | missense         |
| 4T     | PLK5     | NM_001243079.1 | chr19      | 1531871   | A                 | C                | Thr235Pro       | missense         |
| 5T     | PLXNA2   | NM_025179.3    | chr1       | 208202263 | T                 | A                | Thr1784Ser      | missense         |
| 5T     | PLXNA4   | NM_020911.1    | chr7       | 131844338 | C                 | A                | Lys1518Asn      | missense         |
| 5T     | PLXNA4   | NM_020911.1    | chr7       | 132174151 | A                 | T                | Val424Asp       | missense         |
| 2T     | POP1     | NM_001145860.1 | chr8       | 99158829  | G                 | T                | Gly543Val       | missense         |
| 2T     | POTEF    | NM_001099771.2 | chr2       | 130832673 | T                 | A                | Tyr791Phe       | missense         |
| 5T     | POTEJ    | XM_929706.4    | chr2       | 131415128 | T                 | C                | Met932Thr       | missense         |
| 1T     | POTEM    | NM_001145442.1 | chr14      | 20020056  | C                 | G                | Lys55Asn        | missense         |
| 1T     | POTEM    | NM_001145442.1 | chr14      | 20020055  | T                 | A                | Thr56Ser        | missense         |
| 2T     | PPEF2    | NM_006239.2    | chr4       | 76805876  | T                 | A                | Asn206Ile       | missense         |
| 3T     | PPP1R3A  | NM_002711.3    | chr7       | 113518151 | G                 | A                | Thr999Ile       | missense         |
| 3T     | PPP1R9A  | NM_017650.2    | chr7       | 94827714  | T                 | G                | Ile603Arg       | missense         |
| 2T     | PRAMEF15 | NM_001098376.2 | chr1       | 13645793  | A                 | T                | Gln108Leu       | missense         |
| 5T     | PRAMEF22 | NM_001100631.1 | chr1       | 13035603  | G                 | A                | Gly21Arg        | missense         |
| 2T     | PRAMEF9  | NM_001010890.1 | chr1       | 13424996  | A                 | T                | Gln108Leu       | missense         |
| 2T     | PRDM16   | NM_199454.2    | chr1       | 3322125   | G                 | C                | Ala367Pro       | missense         |
| 5T     | PREP     | NM_002726.4    | chr6       | 105730443 | T                 | A                | Asn522Tyr       | missense         |
| 4T     | PREX2    | NM_024870.2    | chr8       | 69032488  | A                 | T                | Thr1188Ser      | missense         |
| 1T     | PRKCSH   | NM_001001329.1 | chr19      | 11552104  | A                 | T                | Thr134Ser       | missense         |
| 4T     | PRSS42   | NM_182702.1    | chr3       | 46874617  | C                 | A                | Ala151Ser       | missense         |
| 5T     | PSG3     | NM_021016.3    | chr19      | 43233470  | G                 | T                | Leu350Ile       | missense         |
| 5T     | PTGFRN   | NM_020440.2    | chr1       | 117503877 | A                 | T                | Gln409Leu       | missense         |

| Sample | Gene     | Gene ID        | Chromosome | Position  | Reference<br>Base | Mutation<br>Base | Convert<br>Type | Mutation<br>Type |
|--------|----------|----------------|------------|-----------|-------------------|------------------|-----------------|------------------|
| 3T     | PTN      | NM_002825.5    | chr7       | 136936048 | T                 | A                | His127Leu       | missense         |
| 5T     | PTPN11   | NM_002834.3    | chr12      | 112926909 | A                 | T                | Gln510Leu       | missense         |
| 3T     | PTPN13   | NM_080685.2    | chr4       | 87656828  | G                 | C                | Glu745Gln       | missense         |
| 5T     | PTPN4    | NM_002830.3    | chr2       | 120712820 | A                 | T                | Gln634Leu       | missense         |
| 5T     | PTPRK    | NM_001135648.1 | chr6       | 128410916 | T                 | A                | Asn462Tyr       | missense         |
| 5T     | PTX3     | NM_002852.3    | chr3       | 157160157 | T                 | A                | Cys179Ser       | missense         |
| 1T     | RABGGTA  | NM_182836.2    | chr14      | 24737126  | C                 | A                | Asp396Tyr       | missense         |
| 2T     | RAD21L1  | NM_001136566.2 | chr20      | 1223489   | G                 | A                | Met361Ile       | missense         |
| 5T     | RAD54L2  | NM_015106.2    | chr3       | 51697432  | A                 | T                | Lys1467Ile      | missense         |
| 2T     | RANBP2   | NM_006267.4    | chr2       | 109352564 | A                 | G                | Tyr214Cys       | missense         |
| 3T     | RASAL2   | NM_170692.2    | chr1       | 178425938 | A                 | T                | Gln765Leu       | missense         |
| 3T     | RASAL3   | NM_022904.1    | chr19      | 15574992  | G                 | T                | Gln60Lys        | missense         |
| 1T     | RASSF7   | NM_001143993.1 | chr11      | 562159    | G                 | T                | Ala69Ser        | missense         |
| 1T     | RBM45    | NM_152945.2    | chr2       | 178988855 | A                 | G                | Gln357Arg       | missense         |
| 3T     | RDH16    | NM_003708.3    | chr12      | 57345829  | G                 | T                | Pro313Gln       | missense         |
| 1T     | REPS1    | NM_031922.3    | chr6       | 139265733 | A                 | G                | Ser219Pro       | missense         |
| 5T     | RETSAT   | NM_017750.3    | chr2       | 85570849  | C                 | T                | Gly536Arg       | missense         |
| 5T     | RETSAT   | NM_017750.3    | chr2       | 85570857  | G                 | A                | Ala533Val       | missense         |
| 2T     | RFTN2    | NM_144629.2    | chr2       | 198460743 | A                 | T                | Met402Lys       | missense         |
| 4T     | RGS7     | NM_002924.4    | chr1       | 240977008 | T                 | A                | Gln289Leu       | missense         |
| 2T     | RGS5TP   | NM_001029875.1 | chr5       | 63905039  | A                 | C                | Lys245Thr       | missense         |
| 2T     | RHBDL2   | NM_017821.3    | chr1       | 39361672  | A                 | T                | Leu193Gln       | missense         |
| 1T     | RHOBTB1  | NM_014836.4    | chr10      | 62671122  | C                 | G                | Arg60Pro        | missense         |
| 3T     | RLTPR    | NM_001013838.1 | chr16      | 67688482  | A                 | T                | Ser1157Cys      | missense         |
| 5T     | RNF38    | NM_194330.2    | chr9       | 36351176  | G                 | T                | Pro317His       | missense         |
| 2T     | ROBO1    | NM_002941.3    | chr3       | 78688970  | G                 | T                | His987Gln       | missense         |
| 5T     | RPGRIP1L | NM_001127897.1 | chr16      | 53726139  | T                 | A                | Glu123Val       | missense         |
| 2T     | RPS3A    | NM_001006.4    | chr4       | 152024228 | A                 | T                | Lys187Ile       | missense         |
| 2T     | RREB1    | NM_001168344.1 | chr6       | 7231841   | T                 | G                | Val1170Gly      | missense         |
| 2T     | RSBN1L   | NM_198467.2    | chr7       | 77378954  | A                 | T                | Lys306Met       | missense         |
| 2T     | RTN1     | NM_021136.2    | chr14      | 60213180  | A                 | T                | Ser87Arg        | missense         |
| 2T     | RTTN     | NM_173630.3    | chr18      | 67671398  | T                 | A                | Asn2224Tyr      | missense         |
| 4T     | RXFP1    | NM_001253728.1 | chr4       | 159568318 | T                 | A                | Ile541Asn       | missense         |
| 5T     | RYSR2    | NM_001035.2    | chr1       | 237754112 | T                 | A                | Leu1327His      | missense         |
| 5T     | RYSR2    | NM_001035.2    | chr1       | 237993845 | T                 | A                | Cys4891Ser      | missense         |
| 4T     | RYSR3    | NM_001036.3    | chr15      | 33831643  | G                 | T                | Val1176Leu      | missense         |
| 4T     | SACS     | NM_014363.4    | chr13      | 23915220  | T                 | A                | His932Leu       | missense         |
| 4T     | SACS     | NM_014363.4    | chr13      | 23929882  | T                 | A                | Gln290Leu       | missense         |
| 5T     | SBF2     | NM_030962.3    | chr11      | 10050026  | T                 | A                | Ser198Cys       | missense         |
| 2T     | SCIN     | NM_001112706.2 | chr7       | 12617698  | G                 | T                | Cys70Phe        | missense         |
| 5T     | SCN2A    | NM_001040142.1 | chr2       | 166237637 | A                 | T                | Gln1494Leu      | missense         |
| 5T     | SCN7A    | NM_002976.3    | chr2       | 167327193 | A                 | T                | Leu199Gln       | missense         |

| Sample | Gene      | Gene ID        | Chromosome | Position  | Reference<br>Base | Mutation<br>Base | Convert<br>Type | Mutation<br>Type |
|--------|-----------|----------------|------------|-----------|-------------------|------------------|-----------------|------------------|
| 5T     | SDF2      | NM_006923.3    | chr17      | 26976089  | T                 | C                | Asn185Ser       | missense         |
| 5T     | SDF4      | NM_016176.3    | chr1       | 1154008   | C                 | A                | Asp248Tyr       | missense         |
| 1T     | SDK2      | NM_001144952.1 | chr17      | 71364703  | G                 | T                | Asn1670Lys      | missense         |
| 2T     | SEC11A    | NM_014300.2    | chr15      | 85224050  | T                 | A                | Ile109Phe       | missense         |
| 5T     | SEC16A    | NM_014866.1    | chr9       | 139358015 | T                 | A                | Gln1516Leu      | missense         |
| 2T     | SEC24C    | NM_198597.2    | chr10      | 75526556  | G                 | A                | Arg613Lys       | missense         |
| 4T     | SECISBP2L | NM_014701.3    | chr15      | 49309825  | C                 | A                | Asp346Tyr       | missense         |
| 5T     | SEMA4B    | NM_020210.3    | chr15      | 90771800  | C                 | A                | Ser813Arg       | missense         |
| 5T     | SFXN4     | NM_213649.1    | chr10      | 120920579 | C                 | A                | Trp89Cys        | missense         |
| 1T     | SGSM3     | NM_015705.4    | chr22      | 40803271  | G                 | A                | Arg436Gln       | missense         |
| 3T     | SIK2      | NM_015191.1    | chr11      | 111571713 | A                 | T                | Glu194Asp       | missense         |
| 5T     | SIRPG     | NM_018556.3    | chr20      | 1617080   | A                 | G                | Cys168Arg       | missense         |
| 5T     | SLC18A2   | NM_003054.4    | chr10      | 119026512 | T                 | A                | Leu363Gln       | missense         |
| 5T     | SLC22A10  | NM_001039752.3 | chr11      | 63058037  | A                 | C                | Lys134Gln       | missense         |
| 5T     | SLC30A8   | NM_001172811.1 | chr8       | 118183282 | A                 | T                | Lys231Met       | missense         |
| 5T     | SLC32A1   | NM_080552.2    | chr20      | 37356692  | A                 | G                | Met330Val       | missense         |
| 3T     | SLC34A2   | NM_006424.2    | chr4       | 25673304  | A                 | G                | Thr337Ala       | missense         |
| 4T     | SLC43A2   | NM_152346.1    | chr17      | 1494756   | G                 | C                | Ile246Met       | missense         |
| 5T     | SLC46A3   | NM_181785.3    | chr13      | 29286841  | T                 | A                | Ser346Cys       | missense         |
| 5T     | SLC4A11   | NM_001174089.1 | chr20      | 3209007   | A                 | T                | Leu819Gln       | missense         |
| 2T     | SLC50A1   | NM_018845.3    | chr1       | 155109402 | C                 | T                | Ala86Val        | missense         |
| 5T     | SLC7A8    | NM_012244.3    | chr14      | 23596420  | T                 | A                | Lys525Met       | missense         |
| 1T     | SLC8A1    | NM_001112802.1 | chr2       | 40655622  | T                 | A                | Asp600Val       | missense         |
| 2T     | SLC9A3    | NM_004174.2    | chr5       | 482779    | G                 | T                | Leu414Met       | missense         |
| 2T     | SLC9A8    | NM_001260491.1 | chr20      | 48467369  | A                 | T                | Asn202Ile       | missense         |
| 5T     | SLFN11    | NM_001104587.1 | chr17      | 33690025  | C                 | A                | Asp268Tyr       | missense         |
| 5T     | SLIT1     | NM_003061.2    | chr10      | 98763901  | A                 | T                | Asp1263Glu      | missense         |
| 5T     | SLITRK5   | NM_015567.1    | chr13      | 88329660  | G                 | C                | Val673Leu       | missense         |
| 2T     | SMARCAL1  | NM_014140.3    | chr2       | 217279522 | A                 | T                | Gln32Leu        | missense         |
| 5T     | SNRNP48   | NM_152551.3    | chr6       | 7593972   | A                 | T                | Glu54Asp        | missense         |
| 2T     | SOBP      | NM_018013.3    | chr6       | 107811822 | T                 | A                | Met1Lys         | missense         |
| 5T     | SOGA3     | NM_001012279.2 | chr6       | 127797342 | A                 | T                | Val610Glu       | missense         |
| 5T     | SON       | NM_138927.1    | chr21      | 34924575  | A                 | T                | Tyr1013Phe      | missense         |
| 5T     | SPATA12   | NM_181727.1    | chr3       | 57107798  | T                 | A                | Ser26Thr        | missense         |
| 5T     | SPATA12   | NM_181727.1    | chr3       | 57107799  | C                 | A                | Ser26Tyr        | missense         |
| 4T     | SPDL1     | NM_017785.4    | chr5       | 169028478 | A                 | T                | Ile507Leu       | missense         |
| 5T     | SPSB1     | NM_025106.3    | chr1       | 9416324   | A                 | T                | His125Leu       | missense         |
| 2T     | SPTBN2    | NM_006946.2    | chr11      | 66472936  | T                 | C                | Tyr604Cys       | missense         |
| 5T     | SPTBN5    | NM_016642.2    | chr15      | 42145559  | T                 | A                | His3321Leu      | missense         |
| 5T     | SSH2      | NM_033389.2    | chr17      | 27959340  | T                 | A                | Ser931Cys       | missense         |
| 2T     | SSH3      | NM_017857.3    | chr11      | 67075102  | G                 | C                | Ala229Pro       | missense         |
| 2T     | ST18      | NM_014682.2    | chr8       | 53084909  | T                 | G                | His171Pro       | missense         |

| Sample | Gene       | Gene ID        | Chromosome | Position  | Reference<br>Base | Mutation<br>Base | Convert<br>Type | Mutation<br>Type |
|--------|------------|----------------|------------|-----------|-------------------|------------------|-----------------|------------------|
| 5T     | ST6GALNAC3 | NM_152996.2    | chr1       | 76877851  | G                 | T                | Met124Ile       | missense         |
| 4T     | STAB2      | NM_017564.9    | chr12      | 104030933 | T                 | A                | Cys210Ser       | missense         |
| 2T     | STAG1      | NM_005862.2    | chr3       | 136183783 | T                 | C                | His418Arg       | missense         |
| 4T     | STARD7     | NM_020151.3    | chr2       | 96861148  | C                 | T                | Val144Met       | missense         |
| 5T     | STARD8     | NM_014725.4    | chrX       | 67942469  | C                 | T                | Thr847Met       | missense         |
| 5T     | SUSD5      | NM_015551.1    | chr3       | 33194514  | A                 | T                | Leu537Gln       | missense         |
| 2T     | SVEP1      | NM_153366.3    | chr9       | 113220792 | A                 | T                | Ser1179Thr      | missense         |
| 2T     | SYT16      | NM_031914.2    | chr14      | 62547876  | G                 | T                | Ala440Ser       | missense         |
| 2T     | SYTL2      | NM_206927.2    | chr11      | 85435898  | T                 | A                | Leu534Phe       | missense         |
| 5T     | TAS1R2     | NM_152232.2    | chr1       | 19183923  | T                 | A                | Ser129Cys       | missense         |
| 5T     | TENM2      | NM_001122679.1 | chr5       | 166802413 | G                 | C                | Ser146Thr       | missense         |
| 4T     | TENM4      | NM_001098816.2 | chr11      | 78413375  | A                 | T                | Val1428Glu      | missense         |
| 4T     | TENM4      | NM_001098816.2 | chr11      | 78567209  | A                 | T                | Phe424Ile       | missense         |
| 5T     | TENM4      | NM_001098816.2 | chr11      | 78381220  | T                 | A                | Tyr2057Phe      | missense         |
| 1T     | TG         | NM_003235.4    | chr8       | 134034377 | T                 | A                | Phe2340Ile      | missense         |
| 5T     | TGM6       | NM_198994.2    | chr20      | 2411598   | C                 | A                | Pro631His       | missense         |
| 4T     | TIMELESS   | NM_003920.3    | chr12      | 56822179  | G                 | T                | Phe473Leu       | missense         |
| 4T     | TIMM44     | NM_006351.3    | chr19      | 7998770   | T                 | A                | Glu221Val       | missense         |
| 5T     | TIMP4      | NM_003256.3    | chr3       | 12198344  | T                 | A                | Ser110Cys       | missense         |
| 5T     | TLE4       | NM_007005.3    | chr9       | 82267689  | A                 | T                | His191Leu       | missense         |
| 5T     | TMC2       | NM_080751.2    | chr20      | 2597897   | T                 | A                | Leu707His       | missense         |
| 2T     | TMC5       | NM_001105248.1 | chr16      | 19485464  | T                 | A                | Ser652Arg       | missense         |
| 3T     | TMCC1      | NM_001128224.2 | chr3       | 129389911 | T                 | C                | Asn144Ser       | missense         |
| 3T     | TMEM178A   | NM_001167959.1 | chr2       | 39944343  | C                 | G                | Ser100Arg       | missense         |
|        | TMEM189-   |                |            |           |                   |                  |                 |                  |
| 5T     | UBE2V1     | NM_199203.2    | chr20      | 48713324  | T                 | C                | Glu242Gly       | missense         |
| 4T     | TMEM44T    | NM_138788.3    | chr11      | 129724666 | T                 | A                | Leu114Met       | missense         |
|        | TNFAIP8L2- |                |            |           |                   |                  |                 |                  |
| 5T     | SCNM1      | NM_001204848.1 | chr1       | 151140654 | C                 | A                | Pro110Thr       | missense         |
| 4T     | TNN        | NM_022093.1    | chr1       | 175052982 | A                 | T                | Lys382Met       | missense         |
| 2T     | TNXB       | NM_019105.6    | chr6       | 32036793  | A                 | T                | Val1903Glu      | missense         |
| 4T     | TPH2       | NM_173353.3    | chr12      | 72425096  | A                 | T                | Gln408Leu       | missense         |
| 4T     | TPTE       | NM_199259.2    | chr21      | 10907008  | A                 | T                | Leu500Gln       | missense         |
| 4T     | Trbv27     | TRBV27         | chr7       | 142423256 | T                 | A                | Leu14Gln        | missense         |
| 2T     | TRIM64C    | NM_001206631.1 | chr11      | 49075387  | A                 | T                | Leu411Gln       | missense         |
| 3T     | TRIO       | NM_007118.2    | chr5       | 14378205  | A                 | T                | Gln1139Leu      | missense         |
| 4T     | TRIP11     | NM_004239.3    | chr14      | 92469864  | T                 | A                | Asn1486Tyr      | missense         |
| 4T     | TRPA1      | NM_007332.2    | chr8       | 72936050  | G                 | C                | Arg1050Gly      | missense         |
| 3T     | TSPY1      | NM_003308.3    | chrY       | 9304872   | A                 | G                | Glu88Gly        | missense         |
| 5T     | TSSK1B     | NM_032028.3    | chr5       | 112770482 | C                 | T                | Gly19Arg        | missense         |
| 5T     | TTC27      | NM_017735.4    | chr2       | 32903924  | A                 | T                | Thr352Ser       | missense         |
| 1T     | TTF1       | NM_001205296.1 | chr9       | 135254455 | T                 | A                | Thr304Ser       | missense         |

| Sample | Gene    | Gene ID        | Chromosome | Position  | Reference<br>Base | Mutation<br>Base | Convert<br>Type | Mutation<br>Type |
|--------|---------|----------------|------------|-----------|-------------------|------------------|-----------------|------------------|
| 5T     | TTK     | NM_003318.4    | chr6       | 80746278  | A                 | T                | Met671Leu       | missense         |
| 5T     | TTLL5   | NM_015072.4    | chr14      | 76198720  | A                 | T                | Lys361Met       | missense         |
| 5T     | TYR     | NM_000372.4    | chr11      | 88911653  | T                 | A                | Trp178Arg       | missense         |
| 5T     | TYRP1   | NM_000550.2    | chr9       | 12704699  | A                 | T                | Asn419Tyr       | missense         |
| 5T     | UBQLN1  | NM_013438.4    | chr9       | 86297929  | T                 | A                | Thr129Ser       | missense         |
| 5T     | UFL1    | NM_015323.4    | chr6       | 96971102  | G                 | A                | Gly53Glu        | missense         |
| 2T     | UNC5C   | NM_003728.3    | chr4       | 96166143  | T                 | C                | Thr310Ala       | missense         |
| 1T     | UNC79   | NM_020818.3    | chr14      | 94004491  | A                 | G                | Thr250Ala       | missense         |
| 2T     | UNC79   | NM_020818.3    | chr14      | 94053131  | A                 | T                | Asp793Val       | missense         |
| 5T     | UPF2    | NM_080599.2    | chr10      | 12071453  | T                 | A                | Ser146Cys       | missense         |
| 2T     | USH2A   | NM_206933.2    | chr1       | 215844382 | T                 | A                | Ile4689Phe      | missense         |
| 5T     | USP17L7 | NM_001256869.1 | chr8       | 11990743  | T                 | A                | Gln259Leu       | missense         |
| 2T     | UTP14A  | NM_006649.3    | chrX       | 129042696 | A                 | G                | Asn75Ser        | missense         |
| 2T     | UTP15   | NM_032175.2    | chr5       | 72865470  | A                 | T                | Ser173Cys       | missense         |
| 2T     | VEPH1   | NM_001167915.1 | chr3       | 157177949 | A                 | T                | Leu184Met       | missense         |
| 2T     | VIM     | NM_003380.3    | chr10      | 17275863  | T                 | A                | Val272Glu       | missense         |
| 4T     | VIT     | NM_001177971.1 | chr2       | 37035638  | C                 | A                | Phe434Leu       | missense         |
| 2T     | VSIG2   | NM_014312.3    | chr11      | 124619649 | G                 | C                | Arg181Gly       | missense         |
| 5T     | VWA3T   | NM_144992.4    | chr2       | 98844729  | A                 | T                | Gln695Leu       | missense         |
| 5T     | WBP1L   | NM_001083913.1 | chr10      | 104573000 | A                 | C                | His335Pro       | missense         |
| 2T     | WDFY1   | NM_020830.3    | chr2       | 224759015 | T                 | G                | Gln256Pro       | missense         |
| 4T     | WDFY3   | NM_014991.4    | chr4       | 85603574  | G                 | A                | Pro3259Leu      | missense         |
| 2T     | WDR52   | NM_001164496.1 | chr3       | 113128050 | T                 | C                | Ile265Val       | missense         |
| 5T     | WDR87   | NM_031951.3    | chr19      | 38379074  | A                 | T                | Leu1707Gln      | missense         |
| 5T     | WDR87   | NM_031951.3    | chr19      | 38385420  | T                 | A                | Lys269Met       | missense         |
| 4T     | ZBTB34  | NM_001099270.1 | chr9       | 129642162 | G                 | A                | Ala158Thr       | missense         |
| 5T     | ZBTB46  | NM_025224.3    | chr20      | 62421321  | A                 | T                | Trp264Arg       | missense         |
| 2T     | ZBTB9   | NM_152735.3    | chr6       | 33424265  | A                 | T                | Gln463Leu       | missense         |
| 2T     | ZDBF2   | NM_020923.1    | chr2       | 207175371 | G                 | A                | Arg2040Gln      | missense         |
| 5T     | ZFP28   | NM_020828.1    | chr19      | 57061939  | T                 | A                | Met288Lys       | missense         |
| 5T     | ZFP3    | NM_153018.2    | chr17      | 4995752   | T                 | A                | Phe318Tyr       | missense         |
| 2T     | ZFP57   | NM_001109809.2 | chr6       | 29641317  | A                 | T                | Tyr191Asn       | missense         |
| 2T     | ZKSCAN8 | NM_006298.2    | chr6       | 28121416  | A                 | T                | Gln453Leu       | missense         |
| 2T     | ZMIZ2   | NM_031449.3    | chr7       | 44805137  | A                 | C                | Gln734Pro       | missense         |
| 5T     | ZMYM2   | NM_003453.3    | chr13      | 20641079  | A                 | G                | Tyr1074Cys      | missense         |
| 5T     | ZNF235  | NM_004234.4    | chr19      | 44792338  | T                 | A                | His417Leu       | missense         |
| 2T     | ZNF28   | NM_006969.3    | chr19      | 53304026  | T                 | A                | Asn358Tyr       | missense         |
| 1T     | ZNF286A | NM_020652.2    | chr17      | 15620417  | A                 | G                | His460Arg       | missense         |
| 4T     | ZNF292  | NM_015021.1    | chr6       | 87966934  | T                 | C                | Leu1196Ser      | missense         |
| 5T     | ZNF324B | NM_207395.2    | chr19      | 58966898  | A                 | T                | Lys196Met       | missense         |
| 1T     | ZNF430  | NM_001172671.1 | chr19      | 21239661  | G                 | T                | Val182Leu       | missense         |
| 5T     | ZNF474  | NM_207317.1    | chr5       | 121487764 | A                 | T                | Ile27Phe        | missense         |



| Sample | Gene      | Gene ID        | Chromosome | Position  | Reference<br>Base | Mutation<br>Base | Convert<br>Type | Mutation<br>Type |
|--------|-----------|----------------|------------|-----------|-------------------|------------------|-----------------|------------------|
| 5T     | ZNF493    | NM_001076678.2 | chr19      | 21607515  | A                 | T                | Tyr685Phe       | missense         |
| 2T     | ZNF518B   | NM_053042.2    | chr4       | 10444802  | A                 | T                | Trp1051Arg      | missense         |
| 5T     | ZNF600    | NM_198457.2    | chr19      | 53268902  | A                 | T                | Phe703Ile       | missense         |
| 4T     | ZNF622    | NM_033414.2    | chr5       | 16451815  | T                 | G                | Lys462Thr       | missense         |
| 5T     | ZNF695    | NM_020394.4    | chr1       | 247150948 | T                 | A                | His290Leu       | missense         |
| 2T     | ZNF735    | NM_001159524.1 | chr7       | 63680489  | A                 | T                | Thr354Ser       | missense         |
| 5T     | ZNF804A   | NM_194250.1    | chr2       | 185801241 | A                 | T                | Gln373Leu       | missense         |
| 4T     | ZNF85     | NM_003429.4    | chr19      | 21132147  | A                 | G                | His276Arg       | missense         |
| 2T     | ZNF880    | NM_001145434.1 | chr19      | 52888185  | T                 | A                | Leu451Gln       | missense         |
| 5T     | ZSCAN20   | NM_145238.3    | chr1       | 33956727  | A                 | T                | Tyr290Phe       | missense         |
| 2T     | ZSWIM1    | NM_080603.4    | chr20      | 44511908  | T                 | C                | Leu226Pro       | missense         |
| 2T     | ABCC1     | NM_004996.3    | chr16      | 16138308  | C                 | T                | Gln271***       | nonsense         |
| 5T     | ADAM18    | NM_014237.2    | chr8       | 39468058  | C                 | T                | Gln119***       | nonsense         |
| 2T     | ADAMTSL1  | NM_001040272.5 | chr9       | 18622291  | T                 | A                | Cys175***       | nonsense         |
| 5T     | AP5M1     | NM_018229.3    | chr14      | 57747084  | A                 | T                | Lys298***       | nonsense         |
| 5T     | ATRN      | NM_139321.2    | chr20      | 3559291   | A                 | T                | Lys806***       | nonsense         |
| 1T     | C3orf70   | NM_001025266.1 | chr3       | 184801113 | A                 | C                | Tyr145***       | nonsense         |
| 2T     | CELA2A    | NM_033440.2    | chr1       | 15789352  | A                 | T                | Lys118***       | nonsense         |
| 5T     | CHRM5     | NM_012125.3    | chr15      | 34356366  | T                 | A                | Leu483***       | nonsense         |
| 5T     | COL12A1   | NM_004370.5    | chr6       | 75898124  | G                 | T                | Cys317***       | nonsense         |
| 5T     | CSMD3     | NM_052900.2    | chr8       | 113504739 | T                 | A                | Arg1649***      | nonsense         |
| 2T     | DHX8      | NM_004941.1    | chr17      | 41570206  | A                 | T                | Arg221***       | nonsense         |
| 2T     | ELP3      | NM_018091.5    | chr8       | 27967944  | C                 | T                | Arg151***       | nonsense         |
| 2T     | EPHB6     | NM_004445.3    | chr7       | 142562095 | G                 | A                | Trp179***       | nonsense         |
| 5T     | ERLIN2    | NM_007175.6    | chr8       | 37611045  | A                 | T                | Lys273***       | nonsense         |
| 4T     | ESRRG     | NM_001134285.2 | chr1       | 216850446 | G                 | T                | Cys125***       | nonsense         |
| 5T     | FBN2      | NM_001999.3    | chr5       | 127645766 | A                 | T                | Cys1703***      | nonsense         |
| 2T     | HIVEP2    | NM_006734.3    | chr6       | 143092731 | T                 | A                | Lys1049***      | nonsense         |
| 4T     | IGHV3-38  | IGHV3-38       | chr14      | 106866489 | T                 | A                | Arg89***        | nonsense         |
| 2T     | KCNT1     | NM_020822.2    | chr9       | 138671278 | A                 | T                | Lys935***       | nonsense         |
| 5T     | KRTAP19-8 | NM_001099219.1 | chr21      | 32410676  | A                 | T                | Tyr29***        | nonsense         |
| 5T     | MAST4     | NM_001164664.1 | chr5       | 66400389  | A                 | T                | Lys448***       | nonsense         |
| 5T     | MCTP2     | NM_018349.3    | chr15      | 94913334  | A                 | T                | Lys503***       | nonsense         |
| 5T     | MMP16     | NM_005941.4    | chr8       | 89068496  | A                 | T                | Tyr411***       | nonsense         |
| 2T     | NES       | NM_006617.1    | chr1       | 156642475 | C                 | T                | Trp502***       | nonsense         |
| 2T     | NUCKS1    | NM_022731.4    | chr1       | 205688697 | T                 | A                | Arg164***       | nonsense         |
| 5T     | OR1L8     | NM_001004454.1 | chr9       | 125330100 | A                 | T                | Tyr219***       | nonsense         |
| 2T     | OR8I2     | NM_001003750.1 | chr11      | 55861230  | T                 | A                | Tyr149***       | nonsense         |
| 5T     | POU3F4    | NM_000307.3    | chrX       | 82764092  | A                 | T                | Lys254***       | nonsense         |
| 4T     | PTPN13    | NM_080685.2    | chr4       | 87694021  | T                 | A                | Tyr1758***      | nonsense         |
| 5T     | RAB6A     | NM_198896.1    | chr11      | 73427381  | T                 | A                | Lys106***       | nonsense         |
| 2T     | RALGDS    | NM_001042368.1 | chr9       | 135975733 | T                 | A                | Lys776***       | nonsense         |

| Sample | Gene    | Gene ID        | Chromosome | Position  | Reference<br>Base | Mutation<br>Base | Convert<br>Type | Mutation<br>Type |
|--------|---------|----------------|------------|-----------|-------------------|------------------|-----------------|------------------|
| 5T     | SLC4A10 | NM_001178016.1 | chr2       | 162719546 | C                 | G                | Ser258***       | nonsense         |
| 5T     | SLC9C1  | NM_183061.1    | chr3       | 111999579 | A                 | T                | Leu47***        | nonsense         |
| 5T     | SOGA2   | NM_015210.3    | chr18      | 8720456   | A                 | T                | Lys107***       | nonsense         |
| 5T     | SPICE1  | NM_144718.3    | chr3       | 113186991 | T                 | A                | Lys384***       | nonsense         |
| 5T     | SPTBN1  | NM_003128.2    | chr2       | 54880905  | A                 | T                | Lys1913***      | nonsense         |
| 5T     | STAG2   | NM_001042749.1 | chrX       | 123171407 | A                 | T                | Lys107***       | nonsense         |
| 4T     | TAS2R43 | NM_176884.2    | chr12      | 11244027  | T                 | A                | Arg268***       | nonsense         |
| 2T     | TEX10   | NM_017746.3    | chr9       | 103090102 | T                 | A                | Lys590***       | nonsense         |
| 5T     | TFAP2D  | NM_172238.3    | chr6       | 50696948  | T                 | A                | Leu269***       | nonsense         |
| 5T     | TRIOBP  | NM_001039141.2 | chr22      | 38119848  | A                 | T                | Arg429***       | nonsense         |
| 5T     | USH2A   | NM_206933.2    | chr1       | 216462732 | T                 | A                | Lys621***       | nonsense         |
| 5T     | WDFY4   | NM_020945.1    | chr10      | 50081705  | T                 | A                | Leu2304***      | nonsense         |

**Supplementary Table 3.** The list of small insertions and deletions discovered in five cases revealed by whole-exome sequencing

| Sample | Gene        | Gene ID        | Chromosome | Position  | Reference<br>Base     | Mutation<br>Base | Amino<br>Acid<br>(protein) | Mutation<br>Type |
|--------|-------------|----------------|------------|-----------|-----------------------|------------------|----------------------------|------------------|
| 5T     | ALB         | NM_000477.5    | chr4       | 74286008  | GC                    | G                | fs                         | deletion         |
| 2T     | CCDC9       | NM_015603.2    | chr19      | 47774985  | TGTGTGCGC<br>GCGCGCGC | T                | fs                         | deletion         |
| 2T     | CCL27       | NM_006664.2    | chr9       | 34662570  | GGTCTGGG<br>CTC       | G                | fs                         | deletion         |
| 1T     | CHD6        | NM_032221.3    | chr20      | 40050637  | CCGTA                 | C                | fs                         | deletion         |
| 5T     | COL15A1     | NM_001855.3    | chr9       | 101818639 | CA                    | C                | fs                         | deletion         |
| 5T     | CORO7-PAM16 | NM_001201479.1 | chr16      | 4407235   | AG                    | A                | fs                         | deletion         |
| 2T     | CRIP3       | NM_206922.2    | chr6       | 43274045  | TTCTCAGC              | T                | fs                         | deletion         |
| 2T     | DACT1       | NM_001079520.1 | chr14      | 59113913  | TA                    | T                | fs                         | deletion         |
| 2T     | DCAF8L1     | NM_001017930.1 | chrX       | 27999273  | AG                    | A                | fs                         | deletion         |
| 4T     | DNAH5       | NM_001369.2    | chr5       | 13708414  | AT                    | A                | fs                         | deletion         |
| 5T     | DNAI1       | NM_012144.2    | chr9       | 34514396  | CT                    | C                | fs                         | deletion         |
| 2T     | EPN2        | NM_148921.3    | chr17      | 19186904  | GC                    | G                | fs                         | deletion         |
| 2T     | FAT3        | NM_001008781.2 | chr11      | 92088511  | TC                    | T                | fs                         | deletion         |
| 5T     | FREM1       | NM_144966.5    | chr9       | 14842494  | TA                    | T                | fs                         | deletion         |
| 2T     | GGT1        | NM_013430.2    | chr22      | 25017036  | CG                    | C                | fs                         | deletion         |

| Sample | Gene     | Gene ID        | Chromosome | Position  | Reference<br>Base    | Mutation<br>Base  | Amino<br>Acid<br>(protein) | Mutation<br>Type |
|--------|----------|----------------|------------|-----------|----------------------|-------------------|----------------------------|------------------|
| 5T     | GIGYF2   | NM_001103147.1 | chr2       | 233655839 | CA                   | C                 | fs                         | deletion         |
| 1T     | GTF3C5   | NM_001122823.1 | chr9       | 135933277 | TGAGGAGG<br>AGGAGGAA | T                 | in-frame                   | deletion         |
| 2T     | IRAK1BP1 | NM_001010844.1 | chr6       | 79608128  | AATAT                | A                 | fs                         | deletion         |
| 1T     | KRTCAP3  | NM_001168364.1 | chr2       | 27666035  | ACGGTGGC             | A                 | fs                         | deletion         |
| 1T     | LTN1     | NM_015565.2    | chr21      | 30303628  | TC                   | T                 | fs                         | deletion         |
| 2T     | MAML2    | NM_032427.1    | chr11      | 95825374  | TTGCTGCTG<br>C       | T                 | in-frame                   | deletion         |
| 2T     | MCM8     | NM_032485.4    | chr20      | 5975124   | GAC                  | G                 | fs                         | deletion         |
| 2T     | MUC16    | NM_024690.2    | chr19      | 9088927   | TG                   | T                 | fs                         | deletion         |
| 5T     | PDCD4    | NM_014456.4    | chr10      | 112657916 | GT                   | G                 | fs                         | deletion         |
| 2T     | PHKB     | NM_000293.2    | chr16      | 47621614  | TG                   | T                 | fs                         | deletion         |
| 2T     | PIK3R1   | NM_181523.2    | chr5       | 67593261  | TTG                  | T                 | fs                         | deletion         |
| 4T     | POU2F1   | NM_002697.3    | chr1       | 167385324 | TA                   | T                 | fs                         | deletion         |
| 2T     | PTPRM    | NM_002845.3    | chr18      | 7949261   | AT                   | A                 | fs                         | deletion         |
| 5T     | RYR3     | NM_001036.3    | chr15      | 34023716  | GTA                  | G                 | fs                         | deletion         |
| 5T     | TARBP1   | NM_005646.3    | chr1       | 234601454 | ACT                  | A                 | fs                         | deletion         |
| 2T     | TSR1     | NM_018128.4    | chr17      | 2239785   | TC                   | T                 | fs                         | deletion         |
| 1T     | UPK2     | NM_006760.3    | chr11      | 118828874 | GC                   | G                 | fs                         | deletion         |
| 5T     | ZEB1     | NM_001174093.1 | chr10      | 31816340  | AAC                  | A                 | fs                         | deletion         |
| 1T     | ZNF148   | NM_021964.2    | chr3       | 124951171 | CTT                  | C                 | fs                         | deletion         |
| 1T     | APOD     | NM_001647.3    | chr3       | 195295708 | G                    | GGGGGT            | fs                         | insertion        |
| 3T     | ATF7IP   | NM_018179.3    | chr12      | 14631383  | C                    | CCA               | fs                         | insertion        |
| 1T     | CDC27    | NM_001114091.1 | chr17      | 45266575  | G                    | GCACCCC           | in-frame                   | insertion        |
| 2T     | CDCP2    | NM_201546.2    | chr1       | 54605318  | T                    | TG                | fs                         | insertion        |
| 1T     | CDH12    | NM_004061.3    | chr5       | 21751718  | A                    | AAAGAG<br>TGTGTGT | in-frame                   | insertion        |
| 3T     | CELSR1   | NM_014246.1    | chr22      | 46773019  | G                    | GC                | fs                         | insertion        |
| 2T     | CKAP2    | NM_001098525.1 | chr13      | 53049033  | G                    | GA                | fs                         | insertion        |

| Sample | Gene     | Gene ID        | Chromosome | Position  | Reference<br>Base | Mutation<br>Base          | Amino<br>Acid<br>(protein) | Mutation<br>Type |
|--------|----------|----------------|------------|-----------|-------------------|---------------------------|----------------------------|------------------|
| 3T     | DARS     | NM_001349.2    | chr2       | 136664812 | C                 | CTTTTTT<br>TTTT           | fs                         | insertion        |
| 2T     | FAM169B  | NM_182562.2    | chr15      | 98980910  | T                 | TG                        | fs                         | insertion        |
| 4T     | FAM171B  | NM_177454.3    | chr2       | 187559029 | A                 | ACAGCA<br>G               | in-frame                   | insertion        |
| 1T     | FBXO9    | NM_033481.3    | chr6       | 52962702  | A                 | ATGTG                     | fs                         | insertion        |
| 2T     | GGT5     | NM_004121.2    | chr22      | 24640638  | G                 | GCCAGCC<br>CCAGCC         | in-frame                   | insertion        |
| 2T     | GPM6A    | NM_201591.2    | chr4       | 176733449 | G                 | GTGTTT                    | fs                         | insertion        |
| 1T     | HRH2     | NM_001131055.1 | chr5       | 175110094 | C                 | CA                        | fs                         | insertion        |
| 5T     | HTR3D    | NM_182537.2    | chr3       | 183756836 | A                 | AT                        | fs                         | insertion        |
| 4T     | IAH1     | NM_001039613.1 | chr2       | 9621453   | G                 | GCT                       | fs                         | insertion        |
| 5T     | KIAA2026 | NM_001017969.2 | chr9       | 5919543   | A                 | AACACA<br>CACACAC<br>ACAC | fs                         | insertion        |
| 3T     | KIFC1    | NM_002263.3    | chr6       | 33377482  | C                 | CTCTGTG<br>TGTG           | fs                         | insertion        |
| 4T     | KRT33A   | NM_004138.3    | chr17      | 39506946  | C                 | CA                        | fs                         | insertion        |
| 2T     | LRSAM1   | NM_138361.5    | chr9       | 130248020 | A                 | AT                        | fs                         | insertion        |
| 2T     | MASP1    | NM_001879.5    | chr3       | 187009803 | C                 | CTG                       | fs                         | insertion        |
| 3T     | MCM8     | NM_032485.4    | chr20      | 5975124   | G                 | GACAC                     | fs                         | insertion        |
| 5T     | NCOR2    | NM_001077261.3 | chr12      | 124824721 | C                 | CGCCGCT<br>GCT            | in-frame                   | insertion        |
| 1T     | NSUN6    | NM_182543.2    | chr10      | 18834797  | T                 | TAAAAA                    | fs                         | insertion        |
| 5T     | OVCH2    | NM_198185.3    | chr11      | 7716915   | A                 | AAG                       | fs                         | insertion        |
| 3T     | PKHD1    | NM_138694.3    | chr6       | 51656083  | A                 | AT                        | fs                         | insertion        |
| 2T     | PLAA     | NM_001031689.2 | chr9       | 26905838  | C                 | CA                        | fs                         | insertion        |
| 5T     | PPP4R4   | NM_058237.1    | chr14      | 94745083  | G                 | GTT                       | fs                         | insertion        |
| 4T     | PRKACG   | NM_002732.3    | chr9       | 71629038  | C                 | CGCGGC<br>GGCG            | in-frame                   | insertion        |
| 4T     | RND3     | NM_001254738.1 | chr2       | 151343978 | G                 | GA                        | fs                         | insertion        |
| 1T     | RYR2     | NM_001035.2    | chr1       | 237969493 | C                 | CT                        | fs                         | insertion        |
| 1T     | SOX9     | NM_000346.3    | chr17      | 70117767  | C                 | CAGGT                     | fs                         | insertion        |

| Sample | Gene         | Gene ID        | Chromosome | Position  | Reference Base | Mutation Base   | Amino Acid (protein) | Mutation Type |
|--------|--------------|----------------|------------|-----------|----------------|-----------------|----------------------|---------------|
| 3T     | SPINT1       | NM_181642.2    | chr15      | 41149322  | T              | TCTCAGC<br>TAAG | fs                   | insertion     |
| 2T     | TAOK3        | NM_016281.3    | chr12      | 118588761 | C              | CT              | fs                   | insertion     |
| 3T     | TMEM180      | NM_024789.3    | chr10      | 104235799 | G              | GTTT            | in-frame             | insertion     |
| 5T     | TMEM247      | NM_001145051.2 | chr2       | 46707812  | G              | GGGAGC<br>A     | in-frame             | insertion     |
| 2T     | TOB1         | NM_001243877.1 | chr17      | 48941417  | C              | AAAAA           | fs                   | insertion     |
| 4T     | ZBTB38       | NM_001080412.2 | chr3       | 141164925 | T              | TA              | fs                   | insertion     |
| 3T     | ZDHHC11      | NM_024786.2    | chr5       | 796029    | T              | TGG             | fs                   | insertion     |
| 2T     | ZFHX3        | NM_001164766.1 | chr16      | 72820938  | C              | CTT             | fs                   | insertion     |
| 1T     | HES1         | NM_005524.3    | chr3       | 193854148 | T              | TAAA            | in-frame             | insertion     |
| 3T     | LOC100505549 | NM_001242804.1 | chr18      | 55335786  | T              | AAAA            | in-frame             | insertion     |
| 2T     | RIN2         | NM_001242581.1 | chr20      | 19867256  | C              | CTTT            | in-frame             | insertion     |
| 5T     | FGG          | NM_000509.4    | chr4       | 155525429 | ATAT           | A               | in-frame             | insertion     |
| 2T     | LY6G5C       | NM_025262.3    | chr6       | 31648129  | CAGG           | C               | in-frame             | insertion     |

**Abbreviation;** fs, frame shift.

**Supplementary Table 4.** GO analysis of the biological processes of the affected SNVs

| GO Term                                                                                          | P-Value     | FDR         | Enrichment  | (-log2P)    |
|--------------------------------------------------------------------------------------------------|-------------|-------------|-------------|-------------|
| cell adhesion                                                                                    | 1.16757E-06 | 0.002100461 | 2.458293411 | 19.70805755 |
| axon guidance                                                                                    | 1.42635E-05 | 0.012830009 | 2.594562447 | 16.09731351 |
| regulation of pH                                                                                 | 0.000248421 | 0.130866661 | 8.154339119 | 11.97492519 |
| vascular endothelial growth factor signaling pathway                                             | 0.000363721 | 0.130866661 | 16.30867824 | 11.42488186 |
| cellular response to caffeine                                                                    | 0.000363721 | 0.130866661 | 16.30867824 | 11.42488186 |
| regulation of cardiac muscle contraction by regulation of the release of sequestered calcium ion | 0.000460107 | 0.13795543  | 9.513395639 | 11.08574282 |
| glucose homeostasis                                                                              | 0.000644791 | 0.165711174 | 3.805358255 | 10.59888176 |
| calcium ion homeostasis                                                                          | 0.000738193 | 0.166001075 | 8.394172622 | 10.40371498 |
| regulation of cell migration                                                                     | 0.001188491 | 0.23756623  | 4.228175839 | 9.716652794 |
| ATP catabolic process                                                                            | 0.00178769  | 0.321098262 | 2.748314296 | 9.127687939 |
| regulation of heart rate                                                                         | 0.001963358 | 0.321098262 | 6.486406117 | 8.992461091 |
| axonogenesis                                                                                     | 0.003127977 | 0.451134888 | 3.251413699 | 8.320554394 |
| actin filament capping                                                                           | 0.005020634 | 0.451134888 | 6.715338098 | 7.637914595 |
| homophilic cell adhesion                                                                         | 0.006149394 | 0.451134888 | 2.446301736 | 7.345339997 |

| GO Term                                                                                   | P-Value     | FDR         | Enrichment  | (-log2P)    |
|-------------------------------------------------------------------------------------------|-------------|-------------|-------------|-------------|
| Purkinje myocyte to ventricular cardiac muscle cell signaling                             | 0.006603405 | 0.451134888 | 28.54018692 | 7.242574135 |
| smoothened signaling pathway involved in spinal cord motor neuron cell fate specification | 0.006603405 | 0.451134888 | 28.54018692 | 7.242574135 |
| smoothened signaling pathway involved in ventral spinal cord interneuron specification    | 0.006603405 | 0.451134888 | 28.54018692 | 7.242574135 |
| spinal cord ventral commissure morphogenesis                                              | 0.006603405 | 0.451134888 | 28.54018692 | 7.242574135 |
| trigeminal nerve morphogenesis                                                            | 0.006603405 | 0.451134888 | 28.54018692 | 7.242574135 |
| calcium-mediated signaling using intracellular calcium source                             | 0.006844968 | 0.451134888 | 9.513395639 | 7.190740455 |
| sensory perception of light stimulus                                                      | 0.006844968 | 0.451134888 | 9.513395639 | 7.190740455 |
| positive regulation vascular endothelial growth factor production                         | 0.007036607 | 0.451134888 | 6.008460403 | 7.150904364 |
| hemopoiesis                                                                               | 0.008355894 | 0.451134888 | 3.275103417 | 6.902990124 |
| calcium ion transport into cytosol                                                        | 0.008674667 | 0.451134888 | 8.562056075 | 6.848975877 |
| regulation of neuron projection development                                               | 0.008674667 | 0.451134888 | 8.562056075 | 6.848975877 |
| melanin biosynthetic process                                                              | 0.008674667 | 0.451134888 | 8.562056075 | 6.848975877 |

**Supplementary Table 5.** Pathway analysis of the affected SNVs

| Pathway Term                                              | P-Value     | FDR         | Enrichment  | (-log2P)    |
|-----------------------------------------------------------|-------------|-------------|-------------|-------------|
| ECM-receptor interaction                                  | 0.000190609 | 0.036215772 | 3.875200829 | 12.35709366 |
| Focal adhesion                                            | 0.002488706 | 0.186761846 | 2.321585903 | 8.650388271 |
| Amoebiasis                                                | 0.003052019 | 0.186761846 | 2.87564506  | 8.356020201 |
| Protein digestion and absorption                          | 0.004895455 | 0.186761846 | 3.049926579 | 7.674341431 |
| Axon guidance                                             | 0.004914785 | 0.186761846 | 2.553426903 | 7.668655858 |
| ABC transporters                                          | 0.008395866 | 0.241392317 | 3.74309171  | 6.89610514  |
| Arrhythmogenic right ventricular cardiomyopathy (ARVC)    | 0.008893401 | 0.241392317 | 2.96749613  | 6.813049025 |
| Calcium signaling pathway                                 | 0.012899819 | 0.306370695 | 2.077247291 | 6.276505398 |
| Hypertrophic cardiomyopathy (HCM)                         | 0.015999568 | 0.337768668 | 2.645719442 | 5.965823194 |
| Legionellosis                                             | 0.021063143 | 0.400199715 | 2.994473368 | 5.569135467 |
| Dilated cardiomyopathy                                    | 0.02382917  | 0.411594748 | 2.439941263 | 5.391127513 |
| Small cell lung cancer                                    | 0.050227398 | 0.79526713  | 2.208567522 | 4.31538166  |
| Vitamin digestion and absorption                          | 0.068923601 | 0.913955661 | 3.431167401 | 3.858858116 |
| Pathways in cancer                                        | 0.073122947 | 0.913955661 | 1.506366176 | 3.773531967 |
| Valine, leucine and isoleucine biosynthesis               | 0.07526237  | 0.913955661 | 4.990788947 | 3.731927474 |
| Olfactory transduction                                    | 0.081514376 | 0.913955661 | 1.437496567 | 3.616801673 |
| Glycosaminoglycan biosynthesis - heparan sulfate          | 0.08177498  | 0.913955661 | 3.167231447 | 3.612196684 |
| Serotonergic synapse                                      | 0.092411207 | 0.975451632 | 1.799956669 | 3.435788363 |
| Folate biosynthesis                                       | 0.108042514 | 0.99376834  | 3.921334172 | 3.210328983 |
| Endocrine and other factor-regulated calcium reabsorption | 0.117699018 | 0.99376834  | 2.240762384 | 3.086825811 |

| Pathway Term                                    | P-Value     | FDR        | Enrichment  | (-log2P)    |
|-------------------------------------------------|-------------|------------|-------------|-------------|
| Viral myocarditis                               | 0.126965424 | 0.99376834 | 1.960667086 | 2.97749243  |
| Mineral absorption                              | 0.129904697 | 0.99376834 | 2.15288935  | 2.944474501 |
| Endocytosis                                     | 0.139007575 | 0.99376834 | 1.494765996 | 2.846764591 |
| African trypanosomiasis                         | 0.141831378 | 0.99376834 | 2.422000518 | 2.817751356 |
| Cardiac muscle contraction                      | 0.142844089 | 0.99376834 | 1.880091727 | 2.807486761 |
| Prion diseases                                  | 0.150157253 | 0.99376834 | 2.352800503 | 2.735453934 |
| Staphylococcus aureus infection                 | 0.155764313 | 0.99376834 | 1.996315579 | 2.682563356 |
| Ribosome biogenesis in eukaryotes               | 0.15952124  | 0.99376834 | 1.805877579 | 2.648179567 |
| Butirosin and neomycin biosynthesis             | 0.193894872 | 0.99376834 | 5.489867841 | 2.36665345  |
| Tryptophan metabolism                           | 0.212114102 | 0.99376834 | 1.960667086 | 2.237087556 |
| Tyrosine metabolism                             | 0.212114102 | 0.99376834 | 1.960667086 | 2.237087556 |
| Synaptic vesicle cycle                          | 0.219753834 | 0.99376834 | 1.7155837   | 2.186039757 |
| Tight junction                                  | 0.223165602 | 0.99376834 | 1.455646776 | 2.163813421 |
| Carbohydrate digestion and absorption           | 0.230722754 | 0.99376834 | 1.871545855 | 2.115767806 |
| Valine, leucine and isoleucine degradation      | 0.230722754 | 0.99376834 | 1.871545855 | 2.115767806 |
| RNA transport                                   | 0.250614203 | 0.99376834 | 1.363942321 | 1.996459917 |
| Notch signaling pathway                         | 0.25913148  | 0.99376834 | 1.752085481 | 1.948243805 |
| Long-term depression                            | 0.265617634 | 0.99376834 | 1.568533669 | 1.912577168 |
| Amino sugar and nucleotide sugar metabolism     | 0.26870103  | 0.99376834 | 1.7155837   | 1.895926241 |
| Vascular smooth muscle contraction              | 0.269399304 | 0.99376834 | 1.407658421 | 1.892181972 |
| Pertussis                                       | 0.297066219 | 0.99376834 | 1.483748065 | 1.751143535 |
| Taste transduction                              | 0.297603459 | 0.99376834 | 1.614667012 | 1.748536798 |
| Galactose metabolism                            | 0.299415155 | 0.99376834 | 1.893057876 | 1.739780851 |
| Synthesis and degradation of ketone bodies      | 0.301710885 | 0.99376834 | 3.049926579 | 1.728761348 |
| Neuroactive ligand-receptor interaction         | 0.310550981 | 0.99376834 | 1.206564361 | 1.687097971 |
| Cell cycle                                      | 0.311798511 | 0.99376834 | 1.328193833 | 1.681314058 |
| O-Glycan biosynthesis                           | 0.312523579 | 0.99376834 | 1.829955947 | 1.677963053 |
| Pancreatic secretion                            | 0.320390185 | 0.99376834 | 1.358878179 | 1.642098144 |
| Melanogenesis                                   | 0.320390185 | 0.99376834 | 1.358878179 | 1.642098144 |
| Histidine metabolism                            | 0.325575393 | 0.99376834 | 1.77092511  | 1.618936429 |
| Sulfur relay system                             | 0.326322095 | 0.99376834 | 2.744933921 | 1.61563142  |
| Retrograde endocannabinoid signaling            | 0.327305499 | 0.99376834 | 1.345555843 | 1.611290256 |
| Basal cell carcinoma                            | 0.336331855 | 0.99376834 | 1.497236684 | 1.572042669 |
| Starch and sucrose metabolism                   | 0.336331855 | 0.99376834 | 1.497236684 | 1.572042669 |
| Hedgehog signaling pathway                      | 0.346005116 | 0.99376834 | 1.470500315 | 1.531134726 |
| Riboflavin metabolism                           | 0.3729622   | 0.99376834 | 2.287444934 | 1.422898676 |
| Toxoplasmosis                                   | 0.373820699 | 0.99376834 | 1.22907489  | 1.419581641 |
| Alzheimer's disease                             | 0.382498182 | 0.99376834 | 1.193449531 | 1.386475205 |
| Cholinergic synapse                             | 0.396819506 | 0.99376834 | 1.225416929 | 1.333445152 |
| Colorectal cancer                               | 0.40353375  | 0.99376834 | 1.328193833 | 1.309238756 |
| Salivary secretion                              | 0.416584176 | 0.99376834 | 1.233678167 | 1.263320056 |
| Rheumatoid arthritis                            | 0.432306038 | 0.99376834 | 1.206564361 | 1.209875107 |
| Glycosphingolipid biosynthesis - ganglio series | 0.436914649 | 0.99376834 | 1.829955947 | 1.194576616 |

| Pathway Term                                               | P-Value     | FDR        | Enrichment  | (-log2P)    |
|------------------------------------------------------------|-------------|------------|-------------|-------------|
| Glycosaminoglycan biosynthesis - keratan sulfate           | 0.436914649 | 0.99376834 | 1.829955947 | 1.194576616 |
| Parkinson's disease                                        | 0.438242665 | 0.99376834 | 1.163107594 | 1.190198152 |
| Epithelial cell signaling in Helicobacter pylori infection | 0.459447331 | 0.99376834 | 1.211000259 | 1.122028608 |
| Complement and coagulation cascades                        | 0.468548465 | 0.99376834 | 1.193449531 | 1.093729812 |
| Other glycan degradation                                   | 0.475868643 | 0.99376834 | 1.614667012 | 1.071364702 |
| Pantothenate and CoA biosynthesis                          | 0.475868643 | 0.99376834 | 1.614667012 | 1.071364702 |
| Long-term potentiation                                     | 0.477578529 | 0.99376834 | 1.176400252 | 1.066190117 |
| Transcriptional misregulation in cancer                    | 0.484186647 | 0.99376834 | 1.073437846 | 1.046364802 |
| Phenylalanine metabolism                                   | 0.494318844 | 0.99376834 | 1.524963289 | 1.016486191 |
| Chronic myeloid leukemia                                   | 0.504214176 | 0.99376834 | 1.128055036 | 0.987891415 |
| Basal transcription factors                                | 0.508116599 | 0.99376834 | 1.193449531 | 0.976768502 |
| GnRH signaling pathway                                     | 0.508691324 | 0.99376834 | 1.087102543 | 0.975137607 |
| Glycosaminoglycan degradation                              | 0.512116822 | 0.99376834 | 1.444702064 | 0.965455145 |
| Dopaminergic synapse                                       | 0.518545455 | 0.99376834 | 1.055743816 | 0.947457636 |
| Gastric acid secretion                                     | 0.521567353 | 0.99376834 | 1.097973568 | 0.939074527 |
| Regulation of actin cytoskeleton                           | 0.529184967 | 0.99376834 | 1.021370761 | 0.918156018 |
| Type II diabetes mellitus                                  | 0.529949751 | 0.99376834 | 1.143722467 | 0.916072522 |
| Antigen processing and presentation                        | 0.530116085 | 0.99376834 | 1.083526548 | 0.91561978  |
| Chagas disease                                             | 0.530682414 | 0.99376834 | 1.055743816 | 0.914079355 |
| Osteoclast differentiation                                 | 0.531456132 | 0.99376834 | 1.039747697 | 0.911977482 |
| Terpenoid backbone biosynthesis                            | 0.5458479   | 0.99376834 | 1.307111391 | 0.873429093 |
| Cocaine addiction                                          | 0.551105173 | 0.99376834 | 1.097973568 | 0.859600426 |
| Malaria                                                    | 0.561425208 | 0.99376834 | 1.076444675 | 0.832834252 |
| Protein processing in endoplasmic reticulum                | 0.566606108 | 0.99376834 | 0.992144791 | 0.819581941 |
| Phosphatidylinositol signaling system                      | 0.571508839 | 0.99376834 | 1.016642193 | 0.807152283 |
| Protein export                                             | 0.577237377 | 0.99376834 | 1.193449531 | 0.792763376 |
| Proximal tubule bicarbonate reclamation                    | 0.577237377 | 0.99376834 | 1.193449531 | 0.792763376 |
| Mismatch repair                                            | 0.577237377 | 0.99376834 | 1.193449531 | 0.792763376 |
| Glycosylphosphatidylinositol(GPI)-anchor biosynthesis      | 0.606448465 | 0.99376834 | 1.097973568 | 0.721543041 |
| Maturity onset diabetes of the young                       | 0.606448465 | 0.99376834 | 1.097973568 | 0.721543041 |
| Leukocyte transendothelial migration                       | 0.613237142 | 0.99376834 | 0.946528938 | 0.705483016 |
| Arginine and proline metabolism                            | 0.619699378 | 0.99376834 | 0.963134709 | 0.690359574 |
| Hematopoietic cell lineage                                 | 0.625439476 | 0.99376834 | 0.935772928 | 0.677057814 |
| Collecting duct acid secretion                             | 0.633632957 | 0.99376834 | 1.016642193 | 0.658280719 |
| Gap junction                                               | 0.639951252 | 0.99376834 | 0.914977974 | 0.643966081 |
| MAPK signaling pathway                                     | 0.641048888 | 0.99376834 | 0.921806167 | 0.64149371  |
| Homologous recombination                                   | 0.646509739 | 0.99376834 | 0.980333543 | 0.629255992 |
| Morphine addiction                                         | 0.654058079 | 0.99376834 | 0.895087148 | 0.612509345 |
| Inositol phosphate metabolism                              | 0.655087731 | 0.99376834 | 0.899978335 | 0.610239965 |
| beta-Alanine metabolism                                    | 0.658932023 | 0.99376834 | 0.946528938 | 0.601798453 |



| Pathway Term                              | P-Value     | FDR        | Enrichment  | (-log2P)    |
|-------------------------------------------|-------------|------------|-------------|-------------|
| Citrate cycle (TCA cycle)                 | 0.670915919 | 0.99376834 | 0.914977974 | 0.57579612  |
| Butanoate metabolism                      | 0.670915919 | 0.99376834 | 0.914977974 | 0.57579612  |
| Fc gamma R-mediated phagocytosis          | 0.674457028 | 0.99376834 | 0.866821238 | 0.568201568 |
| Glutamatergic synapse                     | 0.674594484 | 0.99376834 | 0.871407594 | 0.567907573 |
| Retinol metabolism                        | 0.70312505  | 0.99376834 | 0.81938326  | 0.508146801 |
| Base excision repair                      | 0.704389891 | 0.99376834 | 0.831798158 | 0.50555389  |
| Pentose and glucuronate interconversions  | 0.714770163 | 0.99376834 | 0.807333506 | 0.484448683 |
| Selenoamino acid metabolism               | 0.724784392 | 0.99376834 | 0.784266834 | 0.464376207 |
| Renal cell carcinoma                      | 0.724963026 | 0.99376834 | 0.784266834 | 0.464020676 |
| Pancreatic cancer                         | 0.724963026 | 0.99376834 | 0.784266834 | 0.464020676 |
| Bacterial invasion of epithelial cells    | 0.724963026 | 0.99376834 | 0.784266834 | 0.464020676 |
| Amphetamine addiction                     | 0.724963026 | 0.99376834 | 0.784266834 | 0.464020676 |
| DNA replication                           | 0.73444554  | 0.99376834 | 0.762481645 | 0.445272577 |
| Fructose and mannose metabolism           | 0.73444554  | 0.99376834 | 0.762481645 | 0.445272577 |
| Leishmaniasis                             | 0.738748187 | 0.99376834 | 0.762481645 | 0.436845411 |
| Insulin signaling pathway                 | 0.743616942 | 0.99376834 | 0.789909042 | 0.427368455 |
| Glycine, serine and threonine metabolism  | 0.743766109 | 0.99376834 | 0.741874033 | 0.427079084 |
| Cytokine-cytokine receptor interaction    | 0.744568875 | 0.99376834 | 0.828659297 | 0.425522786 |
| Adherens junction                         | 0.745414876 | 0.99376834 | 0.752036691 | 0.423884484 |
| Viral carcinogenesis                      | 0.761106155 | 0.99376834 | 0.79563302  | 0.393830409 |
| VEGF signaling pathway                    | 0.764537172 | 0.99376834 | 0.722351032 | 0.387341447 |
| Nicotine addiction                        | 0.769802781 | 0.99376834 | 0.68623348  | 0.377439211 |
| Graft-versus-host disease                 | 0.777877392 | 0.99376834 | 0.669496078 | 0.362385318 |
| Aminoacyl-tRNA biosynthesis               | 0.777877392 | 0.99376834 | 0.669496078 | 0.362385318 |
| Aldosterone-regulated sodium reabsorption | 0.785667571 | 0.99376834 | 0.653555695 | 0.348009082 |
| Peroxisome                                | 0.788068396 | 0.99376834 | 0.68623348  | 0.34360725  |
| Porphyrin and chlorophyll metabolism      | 0.79318338  | 0.99376834 | 0.638356726 | 0.334273646 |
| Type I diabetes mellitus                  | 0.79318338  | 0.99376834 | 0.638356726 | 0.334273646 |
| Wnt signaling pathway                     | 0.796777853 | 0.99376834 | 0.727134813 | 0.327750547 |
| Phagosome                                 | 0.80077259  | 0.99376834 | 0.722351032 | 0.320535502 |
| Fat digestion and absorption              | 0.81417992  | 0.99376834 | 0.596724765 | 0.296580453 |
| Nucleotide excision repair                | 0.81417992  | 0.99376834 | 0.596724765 | 0.296580453 |
| Salmonella infection                      | 0.814528766 | 0.99376834 | 0.645866805 | 0.295962445 |
| Lysosome                                  | 0.81453814  | 0.99376834 | 0.680562129 | 0.295945842 |
| Progesterone-mediated oocyte maturation   | 0.819449939 | 0.99376834 | 0.638356726 | 0.287272279 |
| Lysine degradation                        | 0.83303645  | 0.99376834 | 0.560190596 | 0.263548472 |
| N-Glycan biosynthesis                     | 0.83303645  | 0.99376834 | 0.560190596 | 0.263548472 |
| Apoptosis                                 | 0.83351267  | 0.99376834 | 0.616839083 | 0.262723966 |
| GABAergic synapse                         | 0.83351267  | 0.99376834 | 0.616839083 | 0.262723966 |
| Glutathione metabolism                    | 0.84452766  | 0.99376834 | 0.538222337 | 0.24378342  |
| Fanconi anemia pathway                    | 0.849971938 | 0.99376834 | 0.527871908 | 0.234512884 |
| Autoimmune thyroid disease                | 0.849971938 | 0.99376834 | 0.527871908 | 0.234512884 |
| Drug metabolism - other enzymes           | 0.849971938 | 0.99376834 | 0.527871908 | 0.234512884 |

| Pathway Term                                 | P-Value     | FDR        | Enrichment  | (-log2P)    |
|----------------------------------------------|-------------|------------|-------------|-------------|
| Amyotrophic lateral sclerosis (ALS)          | 0.855224763 | 0.99376834 | 0.517912061 | 0.225624468 |
| Cell adhesion molecules (CAMs)               | 0.859519822 | 0.99376834 | 0.619158027 | 0.218397184 |
| Glycerolipid metabolism                      | 0.860292897 | 0.99376834 | 0.508321096 | 0.217100169 |
| Vibrio cholerae infection                    | 0.860292897 | 0.99376834 | 0.508321096 | 0.217100169 |
| Ubiquitin mediated proteolysis               | 0.872213832 | 0.99376834 | 0.601080421 | 0.197246226 |
| Natural killer cell mediated cytotoxicity    | 0.872213832 | 0.99376834 | 0.601080421 | 0.197246226 |
| Acute myeloid leukemia                       | 0.874453211 | 0.99376834 | 0.481567355 | 0.193546902 |
| NOD-like receptor signaling pathway          | 0.894925066 | 0.99376834 | 0.442731278 | 0.160161207 |
| Cytosolic DNA-sensing pathway                | 0.894925066 | 0.99376834 | 0.442731278 | 0.160161207 |
| Herpes simplex infection                     | 0.898017373 | 0.99376834 | 0.596724765 | 0.155184739 |
| Arachidonic acid metabolism                  | 0.898598339 | 0.99376834 | 0.435703797 | 0.1542517   |
| T cell receptor signaling pathway            | 0.901628238 | 0.99376834 | 0.508321096 | 0.149395394 |
| Glycolysis / Gluconeogenesis                 | 0.905562563 | 0.99376834 | 0.422297526 | 0.143113778 |
| Chemokine signaling pathway                  | 0.91063958  | 0.99376834 | 0.577880825 | 0.135047929 |
| Oocyte meiosis                               | 0.912153418 | 0.99376834 | 0.490166772 | 0.132651599 |
| Jak-STAT signaling pathway                   | 0.91750397  | 0.99376834 | 0.531277533 | 0.124213695 |
| Adipocytokine signaling pathway              | 0.918083506 | 0.99376834 | 0.39781651  | 0.123302712 |
| RIG-I-like receptor signaling pathway        | 0.923704419 | 0.99376834 | 0.386610411 | 0.114496825 |
| Melanoma                                     | 0.923704419 | 0.99376834 | 0.386610411 | 0.114496825 |
| Bile secretion                               | 0.923704419 | 0.99376834 | 0.386610411 | 0.114496825 |
| PPAR signaling pathway                       | 0.923704419 | 0.99376834 | 0.386610411 | 0.114496825 |
| Drug metabolism - cytochrome P450            | 0.931418107 | 0.99376834 | 0.370937016 | 0.102499166 |
| Purine metabolism                            | 0.937372191 | 0.99376834 | 0.496072395 | 0.0933061   |
| Fc epsilon RI signaling pathway              | 0.942574118 | 0.99376834 | 0.34745999  | 0.085322027 |
| Spliceosome                                  | 0.942876759 | 0.99376834 | 0.432273058 | 0.084858883 |
| Metabolism of xenobiotics by cytochrome P450 | 0.948373178 | 0.99376834 | 0.334748039 | 0.076473235 |
| TGF-beta signaling pathway                   | 0.951908772 | 0.99376834 | 0.326777848 | 0.071104778 |
| Measles                                      | 0.95340409  | 0.99376834 | 0.40969163  | 0.068840281 |
| Glycerophospholipid metabolism               | 0.953584322 | 0.99376834 | 0.322933402 | 0.068567578 |
| Alcoholism                                   | 0.955084789 | 0.99376834 | 0.460044791 | 0.066299278 |
| Tuberculosis                                 | 0.955084789 | 0.99376834 | 0.460044791 | 0.066299278 |
| Systemic lupus erythematosus                 | 0.95605155  | 0.99376834 | 0.403666753 | 0.064839684 |
| Ribosome                                     | 0.958267389 | 0.99376834 | 0.311924309 | 0.061499822 |
| HTLV-I infection                             | 0.958357518 | 0.99376834 | 0.521850555 | 0.061364138 |
| mRNA surveillance pathway                    | 0.961122819 | 0.99376834 | 0.304992658 | 0.057207294 |
| NF-kappa B signaling pathway                 | 0.962476101 | 0.99376834 | 0.30164109  | 0.055177377 |
| Toll-like receptor signaling pathway         | 0.974577942 | 0.99376834 | 0.269111169 | 0.037150525 |
| Pyrimidine metabolism                        | 0.974577942 | 0.99376834 | 0.269111169 | 0.037150525 |
| Metabolic pathways                           | 0.985274314 | 0.99376834 | 0.666592799 | 0.021402649 |
| Influenza A                                  | 0.985826986 | 0.99376834 | 0.315509646 | 0.020593621 |
| Oxidative phosphorylation                    | 0.98605414  | 0.99376834 | 0.230666716 | 0.020261234 |
| Huntington's disease                         | 0.987441837 | 0.99376834 | 0.308419542 | 0.018232322 |

| Pathway Term                   | P-Value     | FDR        | Enrichment  | (-log2P)    |
|--------------------------------|-------------|------------|-------------|-------------|
| Neurotrophin signaling pathway | 0.990196659 | 0.99376834 | 0.212785575 | 0.014213013 |
| Epstein-Barr virus infection   | 0.99376834  | 0.99376834 | 0.273127753 | 0.009018515 |

**Supplementary Table 6.** Primers used to carry out Sanger sequencing of the frequent mutations

| Gene   | Forward Primer          | Reverse Primer           | Amplification Length |
|--------|-------------------------|--------------------------|----------------------|
| DISC1  | cagaaagaaatcgaagctctcca | ttatggttccggtggctct      | 235                  |
|        | tcaccttgaatgtgtcct      | cccgggtccaaacatggt       | 224                  |
| USH2A  | tgctaccatttctagtccaac   | aggtgcattaaaacggacgt     | 244                  |
|        | tgacgggtgcaacaatcag     | ctcttttgtagacaggaccg     | 223                  |
| TENM4  | accggaagctgtgtcata      | acgctctatgacaccacaa      | 206                  |
|        | gatggccacctgttagc       | tgggatggattagtgtggg      | 241                  |
|        | tcagatgcacaggatgtct     | agatgccctggtttctcgtt     | 211                  |
| UNC79  | gaagagcagttgtcacctgc    | ggagttgtcagaggcagcta     | 250                  |
|        | accaacagctccggaaca      | tgagggtgatctttctggca     | 241                  |
| DNAH17 | ctcggggaggagctgata      | ctttgtggagcctcttcc       | 242                  |
|        | tttcatggacacctctagcctc  | tcctttgtcctcagctcctg     | 257                  |
| MUC16  | ctgttgttggtgccaaggta    | gtgcccactagtgtactact     | 232                  |
|        | ccagtcctgtgatgcttct     | cagtcacagccctaggaag      | 59                   |
| PTPN13 | ggcacaactaacatattgaca   | accagttcaaagtctcaaggt    | 249                  |
|        | aagggtttactccaataaaaggc | tctaacacttctgttacttgga   | 274                  |
| PCLO   | tgaggttatctgggtcca      | cttctaccaagcaccca        | 246                  |
|        | ctgttggtgggtgaggga      | tcatgtgagaatctcctactacgt | 453                  |
| PDE1C  | tgagtaatttgaatgtcaccca  | ggggaagcttcagtggtaga     | 194                  |
|        | ggttgatttaaggcccatgc    | cacctacctgcagctatgga     | 230                  |

Supplementary Figure 2

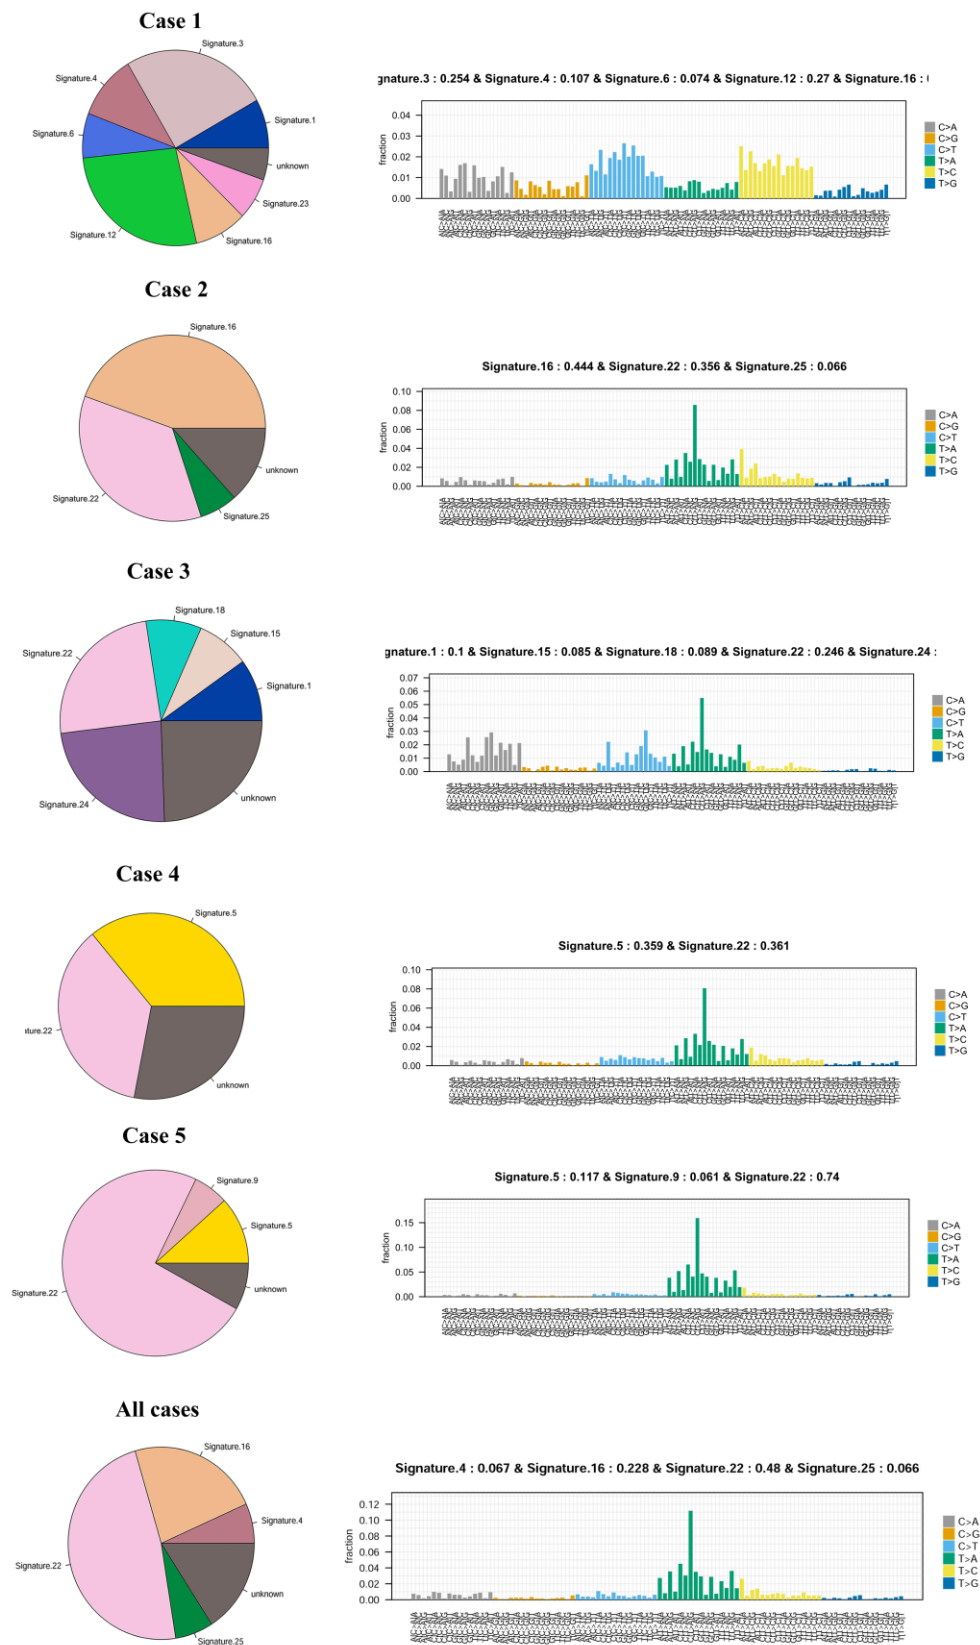

**Supplementary Figure 2.** The mutational signatures consisting of 96 different mutated trinucleotides identified in each case and all cases together. Signature 22 dominated in 4 out of 5 cases.
